# Supplementary material for: Impact sensitivities of energetic materials derived from easy-to-compute ab initio rate constants
Source: Royal Society of Chemistry journal article supplement (doi:10.1039/d2cp05742e), 2023-01-01
Supplement: d2cp05742e4.xlsx [file d2cp05742e4.xlsx]

## Sheet: Table S1
Table S1. Explosphore database. Column content: textual description of the explosophore, activation energy (kJ/mol),
code used in the Mod2P.py Python script, chemical family and SMARTS string
Description	ActivationEnergy	ExploCode	Family	SMARTS
'+(Csp3)-NO2’	174	x10	Nitroaliphatic	[$([NX3](=O)=O),$([NX3+](=O)[O-])][CX4]
'>(Csp3)(-NO2)2’	106	x11	Nitroaliphatic	[$([$([NX3](=O)=O),$([NX3+](=O)[O-])]([CX4]([$([NX3](=O)=O),$([NX3+](=O)[O-])])))][CX4]
'-(Csp3)(-NO2)3'	254	x12	Nitroaliphatic	[$([$([NX3](=O)=O),$([NX3+](=O)[O-])]([CX4]([$([NX3](=O)=O),$([NX3+](=O)[O-])])([$([NX3](=O)=O),$([NX3+](=O)[O-])])))][CX4]
'=C-NO2’	216	x09	Nitroaliphatic	[$([NX3](=O)=O),$([NX3+](=O)[O-])][CX3]
'Car-NO2’	221	x08	Nitroaromatic	[$([NX3](=O)=O),$([NX3+](=O)[O-])]c
'Car-NO2 ortho to NH2’	235	x03	Nitroaromatic	[$([NX3](=O)=O),$([NX3+](=O)[O-])]cc[NX3H2]
'Car-NO2 ortho to OH’	238	x04	Nitroaromatic	[$([NX3](=O)=O),$([NX3+](=O)[O-])]cc[OX2H1]
'Car-NO2 ortho to two NH2’	245	x01	Nitroaromatic	[$([NX3](=O)=O),$([NX3+](=O)[O-])]c(c[NX3H2])(c[NX3H2])
'Car-NO2 ortho to NH2 and OH’	251	x02	Nitroaromatic	[$([NX3](=O)=O),$([NX3+](=O)[O-])][$(c(c[OX2H1])c[NX3H2])]
'Car-NO2 ortho to two NO2’	254	x05	Nitroaromatic	[$([NX3](=O)=O),$([NX3+](=O)[O-])][$(c(c[$([NX3](=O)=O),$([NX3+](=O)[O-])])c[$([NX3](=O)=O),$([NX3+](=O)[O-])])]
'Nitric ester’	104	x17	Nitric Ester	[$([NX3](=O)=O),$([NX3+](=O)[O-])][OX2]
'=N-NO2’	141	x15	Nitramine	[$([NX3](=O)=O),$([NX3+](=O)[O-])][NX2H0;R0]
'>N-NO2’	120	x16	Nitramine	[$([NX3](=O)=O),$([NX3+](=O)[O-])][#7;X3]
'-NH-NO2’	138	x13	Nitramine	[$([NX3](=O)=O),$([NX3+](=O)[O-])][NX3H1]
'N(NO2)-C=O’	149	x14	Nitramine	[$([NX3](=O)=O),$([NX3+](=O)[O-])][NX3](C=O)
'NH-C(NO2)-C’	244	x07	Heterocycle	[$([$([NX3](=O)=O),$([NX3+](=O)[O-])][#6][#7;H1])][#6]
'NO2 ortho to NH on furazan’	67	x06	Heterocycle	[$([NX3](=O)=O),$([NX3+](=O)[O-])][#6;X3]1[#6;X3]([NX3!H0])[#7;X2][#8;X2][#7;X2]1
'C(ar)-N3’	175	cN3	Azide	c-[NX2]~[NX2]~[NX1]
'-NF2’	63	NF2	NF2	[CX4][NX3](F)F
'nitronium’	6	nitronium	Nitronium	N#[#7;X2+]cc[O-]
'Car-NO2 ortho to CH’	221	no2CH	Nitroaromatic	c([$([NX3](=O)=O),$([NX3+](=O)[O-])])c[Ch]
'NO in furoxan ring’	121	NOfuroxan	Heterocycle	[oX2][$([nX3](~[OX1])ccn)]
'NO in furazan ring’	139	NOfurazan	Heterocycle	[oX2][$([nX2]cc[nX2])]
'NO in oxadiazole ring’	103	NO123oxadiazole	Heterocycle	[oX2][nX2][nX2]
'NN in 1,2,3-Triazole’	96	N2lossTri	Heterocycle	[nX2](c)[nX2][nX3]
'NN in 1,2,4-Triazole’	227	N2lossTrz	Heterocycle	[nX2]1[nX2]c[a]c1
'NN in Tetrazole’	93	N2lossTet	Heterocycle	[nX2](n)[nX2][nX3]

## Sheet: Table S2
Table S2. Stretching frequencies and bond lengths of diatomic species,
along with corresponding fitting parameters Z0 and l0 (Eq. 3) for the fast evaluation of kinetic prefactors from bond lengths
Bond order	Z (cm-1)	l (A)
C—N bonds
Triple	2119	1.17
Double	1357	1.35
Single	580	1.71
Broken bond	0	3.25
Eq. 3 parameters	36111	0.0412
N—N bonds
Triple	2394	1.09
Double	1822	1.2
Single	823	1.6
Broken bond	0	3.1
Eq. 3 parameters	24412	0.0467
O—N bonds
Double	1928	1.15
Single	1363	1.27
Broken bond	0	3.07
Eq. 3 parameters	53884	0.0345

## Sheet: Table S3
Table S3. Sensitivity database with estimated solid-state heat of formation in kJ/mol (HoF), observed drop weight impact height in cm (h50/cm), and experimental (lg(H50)) and estimated values of log10(h50/cm). Values in column ‘’set’’: 0 for a compound in the training set, 2 for a compound in the test set, 1 for a compound in the Keshavarz test set. All experimental values measured according to t…
Compound	set	HoF	h50/cm	lg(H50)	Mod-K	Lasso-K	Mod7P	Mod5P	Mod4P	Mod2P	SMILES
TRAINING SET
bis-(2,2,2-trinitroethyl)-nitramine	0	56	5	0.7	0.66	0.83	0.95	0.96	0.95	1.07	O=[N+]([O-])N(CC([N+](=O)[O-])([N+](=O)[O-])[N+](=O)[O-])CC([N+](=O)[O-])([N+](=O)[O-])[N+](=O)[O-]
trinitroethyl-bis-(trinitroethoxy)-acetate	0	762.6	6	0.78	0.96	0.99	1.28	1.31	1.21	1.26	O=C(OCC([N+](=O)[O-])([N+](=O)[O-])[N+](=O)[O-])C(OCC([N+](=O)[O-])([N+](=O)[O-])[N+](=O)[O-])OCC([N+](=O)[O-])([N+](=O)[O-])[N+](=O)[O-]
3-Methyl-2-diazo-4,5,6-trinitrophenol (Me-NO2-DDNP)	0	200.3	8	0.9	1.12	1.02	1.4	1.43	1.46	1.48	Cc1c([N+]#N)c([O-])c([N+](=O)[O-])c([N+](=O)[O-])c1[N+](=O)[O-]
N-nitro-N-(3,3,3-trinitropropyl)-2,2,2-trintroethyl carbamate	0	471.3	9	0.95	0.87	1.01	1.19	1.21	1.15	1.25	O=C(OCC([N+](=O)[O-])([N+](=O)[O-])[N+](=O)[O-])N(CCC([N+](=O)[O-])([N+](=O)[O-])[N+](=O)[O-])[N+](=O)[O-]
2-Diazo-4,6-dinitrophenol (DDNP)	0	140.8	9	0.95	1.07	0.94	1.43	1.46	1.56	1.57	N#[N+]c1cc([N+](=O)[O-])cc([N+](=O)[O-])c1[O-]
bis-(trinitroethyl)-2,4-dinitrazapentanedioate	0	798.5	10	1	0.81	0.89	1.18	1.2	1.12	1.24	O=C(OCC([N+](=O)[O-])([N+](=O)[O-])[N+](=O)[O-])N(CN(C(=O)OCC([N+](=O)[O-])([N+](=O)[O-])[N+](=O)[O-])[N+](=O)[O-])[N+](=O)[O-]
1,1,1,3,6,9,11,11,11-nonanitro-3,6,9-triazaundecane	0	35.5	12	1.08	1.21	1.24	1.22	1.23	1.13	1.27	O=[N+]([O-])N(CCN(CC([N+](=O)[O-])([N+](=O)[O-])[N+](=O)[O-])[N+](=O)[O-])CCN(CC([N+](=O)[O-])([N+](=O)[O-])[N+](=O)[O-])[N+](=O)[O-]
bis-(trinitroethyl)-oxamide	0	470.8	13	1.11	1.16	1.19	1.47	1.5	1.44	1.47	O=C(NCC([N+](=O)[O-])([N+](=O)[O-])[N+](=O)[O-])C(=O)NCC([N+](=O)[O-])([N+](=O)[O-])[N+](=O)[O-]
2,2-bis(nitroxymethyl)-1,3-propanediol dinitrate	0	476.2	13	1.11	1.29	1.31	1.11	1.11	1.11	1.72	O=[N+]([O-])OCC(CO[N+](=O)[O-])(CO[N+](=O)[O-])CO[N+](=O)[O-]
Hexanitrohexaazaisowurtzitane (HNIW or CL-20)	0	-307.3	13	1.11	1.15	1.01	0.93	0.91	0.9	1.18	O=[N+]([O-])N1C2C3N([N+](=O)[O-])C1C1N([N+](=O)[O-])C(C(N1[N+](=O)[O-])N3[N+](=O)[O-])N2[N+](=O)[O-]
1,3,3,5,5-pentanitropiperidine	0	115.9	14	1.15	1.13	1.31	1.15	1.17	1.16	1.26	O=[N+]([O-])N1CC([N+](=O)[O-])([N+](=O)[O-])CC([N+](=O)[O-])([N+](=O)[O-])C1
bis-(2,2,2-trinitroethyl)-3-nitrazaglutarate	0	772.6	14	1.15	1.03	1.15	1.44	1.46	1.38	1.45	O=C(CN(CC(=O)OCC([N+](=O)[O-])([N+](=O)[O-])[N+](=O)[O-])[N+](=O)[O-])OCC([N+](=O)[O-])([N+](=O)[O-])[N+](=O)[O-]
2,3,4,5-Tetranitrotoluene	0	95.7	15	1.18	1.73	1.72	1.54	1.57	1.62	1.62	Cc1cc([N+](=O)[O-])c([N+](=O)[O-])c([N+](=O)[O-])c1[N+](=O)[O-]
Bis-(5,5,5-trinitro-3-nitrazapentanoyl)-methylenedinitramine	0	334.9	15	1.18	1.05	1.04	1.13	1.13	1.04	1.2	O=C(CN(CC([N+](=O)[O-])([N+](=O)[O-])[N+](=O)[O-])[N+](=O)[O-])N(CN(C(=O)CN(CC([N+](=O)[O-])([N+](=O)[O-])[N+](=O)[O-])[N+](=O)[O-])[N+](=O)[O-])[N+](=O)[O-]
trinitropropyl-(2,2-dinitropropyl)-nitramine	0	155.2	17	1.23	1.26	1.41	1.33	1.35	1.3	1.38	CC(CN(CCC([N+](=O)[O-])([N+](=O)[O-])[N+](=O)[O-])[N+](=O)[O-])([N+](=O)[O-])[N+](=O)[O-]
N-nitro-N-(trinitroethyl)-glycinamide	0	261.1	17	1.23	1.08	1.28	1.46	1.48	1.5	1.58	NC(=O)CN(CC([N+](=O)[O-])([N+](=O)[O-])[N+](=O)[O-])[N+](=O)[O-]
1,1,1,6,6,6-hexanitro-3-hexene	0	51.3	17	1.23	1.3	1.32	1.29	1.32	1.29	1.33	O=[N+]([O-])C(CC=CCC([N+](=O)[O-])([N+](=O)[O-])[N+](=O)[O-])([N+](=O)[O-])[N+](=O)[O-]
bis-(trinitroethoxy)-methane	0	411.9	17	1.23	1.03	1.06	1.31	1.34	1.3	1.34	O=[N+]([O-])C(COCOCC([N+](=O)[O-])([N+](=O)[O-])[N+](=O)[O-])([N+](=O)[O-])[N+](=O)[O-]
2,2,2-trinitroethyl carbamate	0	492.9	18	1.26	1.12	1.15	1.64	1.67	1.75	1.73	NC(=O)OCC([N+](=O)[O-])([N+](=O)[O-])[N+](=O)[O-]
N-Methyl-3-amino-N,2,4,5,6-pentanitrotoluene	0	75.6	18	1.26	1.49	1.62	1.45	1.47	1.45	1.52	Cc1c([N+](=O)[O-])c(N(C)[N+](=O)[O-])c([N+](=O)[O-])c([N+](=O)[O-])c1[N+](=O)[O-]
trinitroethyl-N-ethyl-N-nitro-carbamate	0	483.1	19	1.28	1.18	1.36	1.59	1.6	1.6	1.66	CCN(C(=O)OCC([N+](=O)[O-])([N+](=O)[O-])[N+](=O)[O-])[N+](=O)[O-]
Picryl azide	0	-267.4	19	1.28	1.3	1.34	1.32	1.35	1.46	1.48	[N-]=[N+]=Nc1c([N+](=O)[O-])cc([N+](=O)[O-])cc1[N+](=O)[O-]
2,4,6-trinitropyridine-1-oxide	0	7.5	20	1.3	1.43	1.44	1.59	1.62	1.75	1.73	O=[N+]([O-])c1cc([N+](=O)[O-])[n+]([O-])c([N+](=O)[O-])c1
1-(3,3,3-trinitropropyl)-2,4,6-trinitrobenzene	0	90.1	21	1.32	1.6	1.6	1.46	1.49	1.43	1.46	O=[N+]([O-])c1cc([N+](=O)[O-])c(CCC([N+](=O)[O-])([N+](=O)[O-])[N+](=O)[O-])c([N+](=O)[O-])c1
2,2,2-trinitroethyl-2,5,5-trinitro-2-azahexanoate	0	544.4	22	1.34	1.22	1.35	1.45	1.47	1.42	1.48	CC(CCN(C(=O)OCC([N+](=O)[O-])([N+](=O)[O-])[N+](=O)[O-])[N+](=O)[O-])([N+](=O)[O-])[N+](=O)[O-]
bis-(trinitropropyl)-urea	0	364.4	23	1.36	1.52	1.53	1.71	1.74	1.65	1.65	O=C(NCCC([N+](=O)[O-])([N+](=O)[O-])[N+](=O)[O-])NCCC([N+](=O)[O-])([N+](=O)[O-])[N+](=O)[O-]
1,5-bis-(trinitroethyl)-biuret	0	523.5	24	1.38	1.21	1.24	1.58	1.61	1.54	1.55	O=C(NCC([N+](=O)[O-])([N+](=O)[O-])[N+](=O)[O-])NC(=O)NCC([N+](=O)[O-])([N+](=O)[O-])[N+](=O)[O-]
4-nitro-1,2,3-triazole	0	-131.4	25	1.4	1.85	1.87	1.43	1.52	2.36	1.66	O=[N+]([O-])c1cnn[nH]1
cyclotrimethylene-trinitramine	0	-78	26	1.41	1.25	1.28	1.21	1.18	1.28	1.51	O=[N+]([O-])N1CN([N+](=O)[O-])CN([N+](=O)[O-])C1
3-amino-4-nitrofurazan	0	-97.5	27	1.43	1.55	1.58	1.61	0.73	1.04	0.8	Nc1nonc1[N+](=O)[O-]
1,2,3,5-tetranitrobenzene	0	56.1	28	1.45	1.45	1.45	1.27	1.3	1.39	1.42	O=[N+]([O-])c1cc([N+](=O)[O-])c([N+](=O)[O-])c([N+](=O)[O-])c1
bis-(2,2,2-trinitroethyl)-4-nitraza-1,7-heptanedioate	0	824.8	29	1.46	1.34	1.44	1.69	1.71	1.61	1.65	O=C(CCN(CCC(=O)OCC([N+](=O)[O-])([N+](=O)[O-])[N+](=O)[O-])[N+](=O)[O-])OCC([N+](=O)[O-])([N+](=O)[O-])[N+](=O)[O-]
N-(2,2-nitropropyl)-N,2,2-trinitro-1-propanamine	0	202.2	29	1.46	1.5	1.65	1.46	1.47	1.44	1.51	CC(CN(CC(C)([N+](=O)[O-])[N+](=O)[O-])[N+](=O)[O-])([N+](=O)[O-])[N+](=O)[O-]
2,4,6-Trinitrostyrene	0	-27.3	32	1.51	1.97	1.57	2.03	2.06	2.15	2.08	C=Cc1c([N+](=O)[O-])cc([N+](=O)[O-])cc1[N+](=O)[O-]
bis-(2,2,2-trinitroethyl)-4,4,6,6,8,8-hexanitro-undecanedioate	0	1045.2	32	1.51	1.39	1.4	1.49	1.52	1.39	1.42	O=C(CCC(CC(CC(CCC(=O)OCC([N+](=O)[O-])([N+](=O)[O-])[N+](=O)[O-])([N+](=O)[O-])[N+](=O)[O-])([N+](=O)[O-])[N+](=O)[O-])([N+](=O)[O-])[N+](=O)[O-])OCC([N+](=O)[O-])([N+](=O)[O-])[N+](=O)[O-]
N,N'-dinitro-1,2-ethanediamine	0	64	34	1.53	1.35	1.53	1.46	1.43	1.62	1.81	O=[N+]([O-])NCCN[N+](=O)[O-]
1,1,1,7,7,7-hexanitroheptan-4-one	0	329.8	34	1.53	1.42	1.43	1.49	1.52	1.46	1.48	O=C(CCC([N+](=O)[O-])([N+](=O)[O-])[N+](=O)[O-])CCC([N+](=O)[O-])([N+](=O)[O-])[N+](=O)[O-]
N,N'-3,3-tetranitro-1,5-pentanediamine	0	151.4	35	1.54	1.6	1.69	1.52	1.52	1.52	1.64	O=[N+]([O-])NCCC(CCN[N+](=O)[O-])([N+](=O)[O-])[N+](=O)[O-]
2-Amino-3,4,5,6-tetranitrotoluene	0	121.1	36	1.56	1.78	1.77	1.71	1.74	1.76	1.75	Cc1c(N)c([N+](=O)[O-])c([N+](=O)[O-])c([N+](=O)[O-])c1[N+](=O)[O-]
N,N'-dinitro-N,N'-bis-(3,3-dintrobutyl)-oxamide-triazatetradecane	0	579.5	37	1.57	1.69	1.73	1.69	1.7	1.64	1.71	CC(CCN(C(=O)C(=O)N(CCC(C)([N+](=O)[O-])[N+](=O)[O-])[N+](=O)[O-])[N+](=O)[O-])([N+](=O)[O-])[N+](=O)[O-]
2,2',2",4,4",5',6,6"-octanitro-p-terphenyl	0	-37.1	40	1.6	1.89	1.87	1.63	1.66	1.52	1.54	O=[N+]([O-])c1cc([N+](=O)[O-])c(-c2cc([N+](=O)[O-])c(-c3c([N+](=O)[O-])cc([N+](=O)[O-])cc3[N+](=O)[O-])cc2[N+](=O)[O-])c([N+](=O)[O-])c1
4,4,4-trinitrobutyramide	0	323.7	40	1.6	1.61	1.62	1.87	1.9	1.97	1.93	NC(=O)CCC([N+](=O)[O-])([N+](=O)[O-])[N+](=O)[O-]
4,6-dinitro-1-picryl-benzotriazole	0	-212.9	40	1.6	1.56	1.7	1.55	1.59	1.53	1.35	O=[N+]([O-])c1cc([N+](=O)[O-])c(-n2nnc3c([N+](=O)[O-])cc([N+](=O)[O-])cc32)c([N+](=O)[O-])c1
azo-bis-2,2',4,4',6,6'-hexanitrobiphenyl	0	-226.9	40	1.6	1.7	1.69	1.53	1.56	1.37	1.4	O=[N+]([O-])c1cc([N+](=O)[O-])c(-c2c([N+](=O)[O-])cc([N+](=O)[O-])c(N=Nc3c([N+](=O)[O-])cc([N+](=O)[O-])c(-c4c([N+](=O)[O-])cc([N+](=O)[O-])cc4[N+](=O)[O-])c3[N+](=O)[O-])c2[N+](=O)[O-])c([N+](=O)[O-])c1
2,3,4,6-tetranitroaniline	0	81.5	41	1.61	1.52	1.52	1.46	1.49	1.55	1.56	Nc1c([N+](=O)[O-])cc([N+](=O)[O-])c([N+](=O)[O-])c1[N+](=O)[O-]
3-hydroxy-2,2',4,4',6,6'-hexanitrobiphenyl	0	215.2	42	1.62	1.67	1.66	1.54	1.57	1.5	1.52	O=[N+]([O-])c1cc([N+](=O)[O-])c(-c2c([N+](=O)[O-])cc([N+](=O)[O-])c(O)c2[N+](=O)[O-])c([N+](=O)[O-])c1
2,2,4,7,7,10,12,12-octanitro-4,10-diazatridecane	0	279.4	44	1.64	1.74	1.78	1.56	1.57	1.49	1.56	CC(CN(CCC(CCN(CC(C)([N+](=O)[O-])[N+](=O)[O-])[N+](=O)[O-])([N+](=O)[O-])[N+](=O)[O-])[N+](=O)[O-])([N+](=O)[O-])[N+](=O)[O-]
2',2',2'-trinitroethyl-3,5-dinitrosalicylate	0	582	45	1.65	1.47	1.47	1.67	1.7	1.65	1.65	O=C(OCC([N+](=O)[O-])([N+](=O)[O-])[N+](=O)[O-])c1cc([N+](=O)[O-])cc([N+](=O)[O-])c1O
2,4-dinitro-1-picryl-imidazole	0	29.9	46	1.66	1.76	1.89	1.57	1.59	1.57	1.58	O=[N+]([O-])c1cc([N+](=O)[O-])c(-c2[nH]c([N+](=O)[O-])nc2[N+](=O)[O-])c([N+](=O)[O-])c1
2,2',4,4',6,-pentanitrobenzophenone	0	148.7	54	1.73	1.99	1.96	1.84	1.86	1.8	1.78	O=C(c1ccc([N+](=O)[O-])cc1[N+](=O)[O-])c1c([N+](=O)[O-])cc([N+](=O)[O-])cc1[N+](=O)[O-]
1-(3',5'-dinitrophenyl)-4-nitro-1,2,3-triazole	0	-202.5	56	1.75	1.56	1.76	1.69	1.74	1.8	1.5	O=[N+]([O-])c1cc(-n2cc([N+](=O)[O-])nn2)cc([N+](=O)[O-])c1
7-Amino-4,5,6-trinitrobenzofuroxan	0	-90.9	56	1.75	1.62	1.62	1.55	1.48	1.55	1.53	Nc1c([N+](=O)[O-])c([N+](=O)[O-])c([N+](=O)[O-])c2no[n+]([O-])c12
2,2,4,6,6-pentanitroheptane	0	279.4	56	1.75	1.9	1.89	1.65	1.68	1.64	1.63	CC(CC(CC(C)([N+](=O)[O-])[N+](=O)[O-])[N+](=O)[O-])([N+](=O)[O-])[N+](=O)[O-]
2,4,6,2',2",4",6"-heptanitro-4',6'-diaza-m-terphenyl	0	-150.7	58	1.76	1.87	1.86	1.74	1.77	1.64	1.64	O=[N+]([O-])c1cc([N+](=O)[O-])c(-c2ncnc(-c3c([N+](=O)[O-])cc([N+](=O)[O-])cc3[N+](=O)[O-])c2[N+](=O)[O-])c([N+](=O)[O-])c1
2,6-bis-(picrylamino)-3,5-dinitropyridine	0	-59.3	63	1.8	1.84	1.83	1.76	1.78	1.63	1.63	O=[N+]([O-])c1cc([N+](=O)[O-])c(Nc2nc(Nc3c([N+](=O)[O-])cc([N+](=O)[O-])cc3[N+](=O)[O-])c([N+](=O)[O-])cc2[N+](=O)[O-])c([N+](=O)[O-])c1
2,4,5-Trinitroimidazole	0	77	68	1.83	1.37	1.64	1.27	1.3	1.51	1.52	O=[N+]([O-])c1nc([N+](=O)[O-])c([N+](=O)[O-])[nH]1
bis-(2,2,2-trinitroethyl)-4,4-dinitroheptanedioate	0	922.6	68	1.83	1.43	1.44	1.64	1.67	1.56	1.57	O=C(CCC(CCC(=O)OCC([N+](=O)[O-])([N+](=O)[O-])[N+](=O)[O-])([N+](=O)[O-])[N+](=O)[O-])OCC([N+](=O)[O-])([N+](=O)[O-])[N+](=O)[O-]
2,2,2-trinitroethyl-4,4-dinitrovalerate	0	549.9	70	1.85	1.57	1.97	1.69	1.72	1.67	1.67	CC(CCC(=O)OCC([N+](=O)[O-])([N+](=O)[O-])[N+](=O)[O-])([N+](=O)[O-])[N+](=O)[O-]
2,2,4,7,9,9-hexanitro-4,7-diazadecane	0	191.9	72	1.86	1.7	1.75	1.54	1.55	1.5	1.59	CC(CN(CCN(CC(C)([N+](=O)[O-])[N+](=O)[O-])[N+](=O)[O-])[N+](=O)[O-])([N+](=O)[O-])[N+](=O)[O-]
4,6-Dinitrobenzofuroxan	0	-136.3	76	1.88	1.96	1.93	1.76	1.64	1.79	1.74	O=[N+]([O-])c1cc([N+](=O)[O-])c2no[n+]([O-])c2c1
2,6-Dipicrylbenzo-[1,2-d:4,5-d']-bistriazole-4,8-dione	0	-151.2	95	1.98	1.92	1.9	2.19	2.22	2.06	2.01	O=C1c2nn(-c3c([N+](=O)[O-])cc([N+](=O)[O-])cc3[N+](=O)[O-])nc2C(=O)c2nn(-c3c([N+](=O)[O-])cc([N+](=O)[O-])cc3[N+](=O)[O-])nc21
3,5-bis-(picrylamino)-1,2,4-oxadiazole	0	-68	95	1.98	1.85	1.84	1.74	2	1.87	1.84	O=[N+]([O-])c1cc([N+](=O)[O-])c(Nc2noc(Nc3c([N+](=O)[O-])cc([N+](=O)[O-])cc3[N+](=O)[O-])n2)c([N+](=O)[O-])c1
4-(2,4-dinitrobenzyl)-3,5-dinitro-1,2,4-triazole	0	-105.5	96	1.98	2.12	2.02	2.03	1.67	1.65	1.44	O=[N+]([O-])c1ccc(Cn2c([N+](=O)[O-])nnc2[N+](=O)[O-])c([N+](=O)[O-])c1
2,2-dinitrobutyl-4,4,4-trinitrobutyramide	0	420	101	2	1.91	1.9	1.93	1.96	1.89	1.85	CCC(CNC(=O)CCC([N+](=O)[O-])([N+](=O)[O-])[N+](=O)[O-])([N+](=O)[O-])[N+](=O)[O-]
1-dinitromethyl-3-nitrobenzene	0	28.7	105	2.02	2.16	2.08	1.82	1.84	1.9	1.86	O=[N+]([O-])c1cccc(C([N+](=O)[O-])[N+](=O)[O-])c1
2,4,6-trinitrobenzoic acid	0	427.2	109	2.04	2	1.97	1.81	1.84	1.89	1.86	O=C(O)c1c([N+](=O)[O-])cc([N+](=O)[O-])cc1[N+](=O)[O-]
N-(2-propyl)-trinitroacetamide	0	327.1	112	2.05	1.92	1.92	2.13	2.16	2.2	2.13	CC(C)NC(=O)C([N+](=O)[O-])([N+](=O)[O-])[N+](=O)[O-]
5,7-Diamino-4,6-dinitrobenzofuroxan	0	-85.4	120	2.08	2.05	2.03	2.18	2.04	2.13	2.04	Nc1c([N+](=O)[O-])c(N)c2c(no[n+]2[O-])c1[N+](=O)[O-]
ethylene-bis-(4,4,4-trinitrobutyrate)	0	887.3	120	2.08	1.62	1.62	1.92	1.95	1.85	1.82	O=C(CCC([N+](=O)[O-])([N+](=O)[O-])[N+](=O)[O-])OCCOC(=O)CCC([N+](=O)[O-])([N+](=O)[O-])[N+](=O)[O-]
3-amino-4-picrylaminofurazan	0	-136.9	120	2.08	1.98	1.96	2.02	1.52	1.52	1.31	Nc1nonc1Nc1c([N+](=O)[O-])cc([N+](=O)[O-])cc1[N+](=O)[O-]
3,3'-dimethyl-2,2',4,4',6,6'-hexanitrobiphenyl	0	88.7	135	2.13	2.08	2.05	1.82	1.85	1.75	1.73	Cc1c([N+](=O)[O-])cc([N+](=O)[O-])c(-c2c([N+](=O)[O-])cc([N+](=O)[O-])c(C)c2[N+](=O)[O-])c1[N+](=O)[O-]
2,4,6-trinitro-3-aminophenol	0	267.3	138	2.14	1.98	1.73	1.87	1.9	1.98	1.93	Nc1c([N+](=O)[O-])cc([N+](=O)[O-])c(O)c1[N+](=O)[O-]
3-methyl-2,2',4,4',6,-pentanitrobiphenyl	0	29.2	143	2.16	2.19	2.16	1.93	1.95	1.88	1.85	Cc1c([N+](=O)[O-])ccc(-c2c([N+](=O)[O-])cc([N+](=O)[O-])cc2[N+](=O)[O-])c1[N+](=O)[O-]
5,5'-dinitro-3,3'-bi-1,2,4-triazole	0	-187.3	153	2.18	2.21	2.12	2.59	2.61	2.94	2.78	O=[N+]([O-])c1n[nH]c(-c2nc([N+](=O)[O-])n[nH]2)n1
2,4,6-trinitrotoluene	0	75.8	160	2.2	2.16	2.13	1.91	1.94	2.04	1.98	Cc1c([N+](=O)[O-])cc([N+](=O)[O-])cc1[N+](=O)[O-]
2-picryl-1,2,3-triazole	0	-205.8	200	2.3	2.08	2.06	2.28	2.3	2.39	2.29	O=[N+]([O-])c1cc([N+](=O)[O-])c(-n2nccn2)c([N+](=O)[O-])c1
5-nitro-2,4,6-tris-(picrylamino)-pyrimidine	0	-134.7	201	2.3	2.18	2.24	1.83	1.86	1.66	1.65	O=[N+]([O-])c1cc([N+](=O)[O-])c(Nc2nc(Nc3cc([N+](=O)[O-])cc([N+](=O)[O-])c3[N+](=O)[O-])c([N+](=O)[O-])c(Nc3c([N+](=O)[O-])cc([N+](=O)[O-])cc3[N+](=O)[O-])n2)c([N+](=O)[O-])c1
bis-(2,2-dinitropropyl)-oxalate	0	929.1	227	2.36	2.4	2.29	2.05	2.08	2.03	1.98	CC(COC(=O)C(=O)OCC(C)([N+](=O)[O-])[N+](=O)[O-])([N+](=O)[O-])[N+](=O)[O-]
3,5-bispicrylamino-1,2,4-triazole	0	-120.2	240	2.38	2.44	2.31	2.05	2.07	1.94	1.9	O=[N+]([O-])c1cc([N+](=O)[O-])c(Nc2n[nH]c(Nc3c([N+](=O)[O-])cc([N+](=O)[O-])cc3[N+](=O)[O-])n2)c([N+](=O)[O-])c1
1,3-Dimethoxy-2,4,6-trinitrobenzene	0	389.8	251	2.4	2.3	2.34	2.22	2.25	2.26	2.18	COc1c([N+](=O)[O-])cc([N+](=O)[O-])c(OC)c1[N+](=O)[O-]
1,4-dipicrylpyrazole	0	-143.7	314	2.5	2.5	2.43	1.91	1.93	1.82	1.79	O=[N+]([O-])c1cc([N+](=O)[O-])c(-c2cnn(-c3c([N+](=O)[O-])cc([N+](=O)[O-])cc3[N+](=O)[O-])c2)c([N+](=O)[O-])c1
1-picrylimidazole	0	-83.9	314	2.5	2.5	2.43	2.32	2.34	2.39	2.3	O=[N+]([O-])c1cc([N+](=O)[O-])c(-n2ccnc2)c([N+](=O)[O-])c1
2,2-dinitroethyl-4,4-dinitrovalerate	0	580.5	320	2.51	1.86	2.31	1.9	1.93	1.89	1.86	CC(CCC(=O)OCC([N+](=O)[O-])[N+](=O)[O-])([N+](=O)[O-])[N+](=O)[O-]
1,3,5-Triamino-2,4,6-trinitrobenzene (TATB)	0	112.5	490	2.69	2.72	1.99	2.21	2.23	2.29	2.21	Nc1c([N+](=O)[O-])c(N)c([N+](=O)[O-])c(N)c1[N+](=O)[O-]
TEST SET
N,N'-bis-(2,2,2-trinitroethyl)-N,N'-dinitromethanediamine	2	20.1	5	0.7	0.81	0.9	0.98	0.99	0.93	1.08	O=[N+]([O-])N(CN(CC([N+](=O)[O-])([N+](=O)[O-])[N+](=O)[O-])[N+](=O)[O-])CC([N+](=O)[O-])([N+](=O)[O-])[N+](=O)[O-]
2,2,2-trinitroethyl-3',3',3'-trinitropropylnitramine	2	82.1	6	0.78	0.88	1.03	1.07	1.09	1.04	1.15	O=[N+]([O-])N(CCC([N+](=O)[O-])([N+](=O)[O-])[N+](=O)[O-])CC([N+](=O)[O-])([N+](=O)[O-])[N+](=O)[O-]
Erythritol tetranitrate (ETN)	2	457.1	6	0.78	1.03	1.06	0.92	0.92	0.93	1.56	O=[N+]([O-])OCC(O[N+](=O)[O-])C(CO[N+](=O)[O-])O[N+](=O)[O-]
N-(2,2,2-trinitroethyl)-nitraminoethyl nitrate	2	162.3	7	0.85	0.91	1.1	1.07	1.07	1.08	1.32	O=[N+]([O-])OCCN(CC([N+](=O)[O-])([N+](=O)[O-])[N+](=O)[O-])[N+](=O)[O-]
1,1,1,6,6,6-Hexanitro-3-hexyne	2	-109.7	7	0.85	1.19	1.21	1.18	1.2	1.19	1.25	O=[N+]([O-])C(CC#CCC([N+](=O)[O-])([N+](=O)[O-])[N+](=O)[O-])([N+](=O)[O-])[N+](=O)[O-]
tetrakis-(2,2,2-trinitroethyl)-orthocarbonate	2	872.1	7	0.85	0.87	0.9	1.18	1.21	1.06	1.13	O=[N+]([O-])C(COC(OCC([N+](=O)[O-])([N+](=O)[O-])[N+](=O)[O-])(OCC([N+](=O)[O-])([N+](=O)[O-])[N+](=O)[O-])OCC([N+](=O)[O-])([N+](=O)[O-])[N+](=O)[O-])([N+](=O)[O-])[N+](=O)[O-]
tris-(2,2,2-trinitroethyl)-orthoformate	2	613.1	7	0.85	0.92	0.96	1.22	1.25	1.15	1.21	O=[N+]([O-])C(COC(OCC([N+](=O)[O-])([N+](=O)[O-])[N+](=O)[O-])OCC([N+](=O)[O-])([N+](=O)[O-])[N+](=O)[O-])([N+](=O)[O-])[N+](=O)[O-]
1,1,1,3,5,5,5-heptanitropentane	2	133.2	8	0.9	1	1.03	1.06	1.09	1.05	1.12	O=[N+]([O-])C(CC([N+](=O)[O-])([N+](=O)[O-])[N+](=O)[O-])CC([N+](=O)[O-])([N+](=O)[O-])[N+](=O)[O-]
HNFX	2	90.7	8	0.9	1.11	1.93	1.08	1.09	1.07	1.21	O=[N+]([O-])N1CC(N(F)F)(N(F)F)CN([N+](=O)[O-])CC(N(F)F)(N(F)F)C1
5-Chloro-2-diazo-4,6-dinitrophenol (5-Cl-DDNP)	2	172.2	8	0.9	0.75	0.94	1.42	1.45	1.54	1.55	N#[N+]c1cc([N+](=O)[O-])c(Cl)c([N+](=O)[O-])c1[O-]
methyl-2,2,2-trinitroethylnitramine	2	58.2	9	0.95	0.92	1.15	1.17	1.18	1.26	1.37	CN(CC([N+](=O)[O-])([N+](=O)[O-])[N+](=O)[O-])[N+](=O)[O-]
2,2,2-trinitroethyl-N-(2,2,2-trinitroethyl)-nitramino acetate	2	332.5	9	0.95	0.87	1.01	1.19	1.21	1.15	1.25	CC(=O)ON(C(CC([N+](=O)[O-])([N+](=O)[O-])[N+](=O)[O-])C([N+](=O)[O-])([N+](=O)[O-])[N+](=O)[O-])[N+](=O)[O-]
N,N'-dinitro-N,N'-bis-(3,3,3-trinitropropyl)-oxamide	2	433.3	9	0.95	1.05	1.12	1.23	1.25	1.17	1.28	O=C(C(=O)N(CCC([N+](=O)[O-])([N+](=O)[O-])[N+](=O)[O-])[N+](=O)[O-])N(CCC([N+](=O)[O-])([N+](=O)[O-])[N+](=O)[O-])[N+](=O)[O-]
methylene-bis-N'N'-(2,2,2-trinitroacetamide)	2	445.2	9	0.95	0.96	1	1.33	1.35	1.32	1.35	O=C(NCNC(=O)C([N+](=O)[O-])([N+](=O)[O-])[N+](=O)[O-])C([N+](=O)[O-])([N+](=O)[O-])[N+](=O)[O-]
1,9-dinitrato-2,4,6,8-tetranitrazanonane	2	153.3	10	1	1.1	1.07	1	0.99	0.97	1.35	O=[N+]([O-])OCN(CN(CN(CN(CO[N+](=O)[O-])[N+](=O)[O-])[N+](=O)[O-])[N+](=O)[O-])[N+](=O)[O-]
1,1,1,3,6,6,9,11,11,11-decanitro-3,9-diazaundecane	2	133.2	10	1	1.18	1.25	1.2	1.22	1.11	1.22	O=[N+]([O-])N(CCC(CCN(CC([N+](=O)[O-])([N+](=O)[O-])[N+](=O)[O-])[N+](=O)[O-])([N+](=O)[O-])[N+](=O)[O-])CC([N+](=O)[O-])([N+](=O)[O-])[N+](=O)[O-]
1-Picryl-1,2,3-triazole	2	-212.6	10	1	1.56	1.76	1.69	1.74	1.81	1.5	O=[N+]([O-])c1cc([N+](=O)[O-])c(-n2ccnn2)c([N+](=O)[O-])c1
Pentanitrobenzene (PNB)	2	76	11	1.04	1.17	1.19	1.03	1.06	1.11	1.18	O=[N+]([O-])c1cc([N+](=O)[O-])c([N+](=O)[O-])c([N+](=O)[O-])c1[N+](=O)[O-]
Compound (1) in JOC 61,9340 (1996)	2	123	11	1.04	1.88	1.11	1.2	1.17	1.2	1.44	O=C1N([N+](=O)[O-])C2C(C3C2N([N+](=O)[O-])C(=O)N3[N+](=O)[O-])N1[N+](=O)[O-]
1,1,1,4,6,6,8,11,11,11-Decanitro-4,8-diazaundecane	2	133.2	11	1.04	1.18	1.25	1.2	1.22	1.11	1.22	O=[N+]([O-])N(CCC([N+](=O)[O-])([N+](=O)[O-])[N+](=O)[O-])CC(CN(CCC([N+](=O)[O-])([N+](=O)[O-])[N+](=O)[O-])[N+](=O)[O-])([N+](=O)[O-])[N+](=O)[O-]
trinitroethyl-cyanomethylnitramine	2	-81.8	11	1.04	1.03	1.24	1.29	1.29	1.37	1.47	N#CCN(CC([N+](=O)[O-])([N+](=O)[O-])[N+](=O)[O-])[N+](=O)[O-]
1,1,1,5,7,10,14,14,14-nonanitro-3,12-dioxa-4,11-dioxo-5,7,10-triazatetradecane	2	788.2	11	1.04	1.03	1.06	1.28	1.28	1.2	1.32	O=C(OCC([N+](=O)[O-])([N+](=O)[O-])[N+](=O)[O-])N(CCN(CN(C(=O)OCC([N+](=O)[O-])([N+](=O)[O-])[N+](=O)[O-])[N+](=O)[O-])[N+](=O)[O-])[N+](=O)[O-]
Compound (14) in PEP 39,90 (2014)	2	328.4	11	1.04	1.99	1.22	1.31	1.29	1.3	1.53	CC12N([N+](=O)[O-])C(=O)N([N+](=O)[O-])C1(C)N([N+](=O)[O-])C(=O)N2[N+](=O)[O-]
N-methyl-N'-trinitroethyl-N,N'-dinitro-1,2-ethanediamine	2	47.9	11	1.04	1.32	1.41	1.38	1.38	1.36	1.49	CN(CCN(CC([N+](=O)[O-])([N+](=O)[O-])[N+](=O)[O-])[N+](=O)[O-])[N+](=O)[O-]
1-Picrylbenzotriazole	2	-252.7	11	1.04	2.11	2.25	2.16	2.22	2.19	1.84	O=[N+]([O-])c1cc([N+](=O)[O-])c(-n2nnc3ccccc32)c([N+](=O)[O-])c1
hexanitrobenzene	2	95.9	12	1.08	0.96	0.99	0.86	0.89	0.91	1	O=[N+]([O-])c1c([N+](=O)[O-])c([N+](=O)[O-])c([N+](=O)[O-])c([N+](=O)[O-])c1[N+](=O)[O-]
3-[N-(2,2,2-trintro-ethyl)nitramino]propyl nitrate	2	188.4	12	1.08	1.17	1.33	1.26	1.27	1.26	1.48	O=[N+]([O-])OCCCN(CC([N+](=O)[O-])([N+](=O)[O-])[N+](=O)[O-])[N+](=O)[O-]
bis-(trinitroethyl)-5,5-dinitro-2,8-dintraza-nonanedioate	2	911.5	12	1.08	1.14	1.19	1.36	1.37	1.27	1.36	O=C(OCC([N+](=O)[O-])([N+](=O)[O-])[N+](=O)[O-])N(CCC(CCN(C(=O)OCC([N+](=O)[O-])([N+](=O)[O-])[N+](=O)[O-])[N+](=O)[O-])([N+](=O)[O-])[N+](=O)[O-])[N+](=O)[O-]
4,4'-dinitro-3,3'-bifurazan	2	-309.8	13	1.11	1.23	1.26	1.15	0.23	0.43	0.23	O=[N+]([O-])c1nonc1-c1nonc1[N+](=O)[O-]
N,N'-dinitromethanediamine	2	38.4	13	1.11	0.78	1	1.07	1.05	1.29	1.52	O=[N+]([O-])NCN[N+](=O)[O-]
bis-(trinitroethyl)-2,4,6-trinitrazaheptanedioate	2	762.6	13	1.11	0.9	0.94	1.18	1.19	1.1	1.24	O=C(OCC([N+](=O)[O-])([N+](=O)[O-])[N+](=O)[O-])N(CN(CN(C(=O)OCC([N+](=O)[O-])([N+](=O)[O-])[N+](=O)[O-])[N+](=O)[O-])[N+](=O)[O-])[N+](=O)[O-]
1-(2,2,2-trinitroethyl)-2,4,6-trinitrobenzene	2	64	13	1.11	1.4	1.41	1.28	1.31	1.28	1.32	O=[N+]([O-])c1cc([N+](=O)[O-])c(CC([N+](=O)[O-])([N+](=O)[O-])[N+](=O)[O-])c([N+](=O)[O-])c1
N,N'-dinitromethylene-bis-(4,4,4-trinitro)-butyramide	2	459.9	13	1.11	1.2	1.27	1.36	1.37	1.28	1.38	O=C(CCC([N+](=O)[O-])([N+](=O)[O-])[N+](=O)[O-])N(CN(C(=O)CCC([N+](=O)[O-])([N+](=O)[O-])[N+](=O)[O-])[N+](=O)[O-])[N+](=O)[O-]
1,3,5-tris(1-oxo-5,5,5-trinitro-3-nitrazapentyl)-s-triazacyclohexane	2	472.5	13	1.11	1.39	1.4	1.55	1.56	1.41	1.49	O=C(CN(CC([N+](=O)[O-])([N+](=O)[O-])[N+](=O)[O-])[N+](=O)[O-])N1CN(C(=O)CN(CC([N+](=O)[O-])([N+](=O)[O-])[N+](=O)[O-])[N+](=O)[O-])CN(C(=O)CN(CC([N+](=O)[O-])([N+](=O)[O-])[N+](=O)[O-])[N+](=O)[O-])C1
Compound (23) in PEP 19,249 (1994)	2	183.6	13	1.11	1.85	1.84	1.65	1.65	1.51	1.55	O=[N+]([O-])OCCNc1c([N+](=O)[O-])cc([N+](=O)[O-])c(-c2nnc(-c3c([N+](=O)[O-])cc([N+](=O)[O-])c(NCCO[N+](=O)[O-])c3[N+](=O)[O-])o2)c1[N+](=O)[O-]
bis-(trinitroethyl)-fumarate	2	715.7	14	1.15	1.2	1.22	1.55	1.58	1.51	1.53	O=C(C=CC(=O)OCC([N+](=O)[O-])([N+](=O)[O-])[N+](=O)[O-])OCC([N+](=O)[O-])([N+](=O)[O-])[N+](=O)[O-]
pentanitroaniline	2	101.4	15	1.18	1.24	1.26	1.2	1.23	1.26	1.31	Nc1c([N+](=O)[O-])c([N+](=O)[O-])c([N+](=O)[O-])c([N+](=O)[O-])c1[N+](=O)[O-]
trinitroethyl-nitroguanidine	2	40.9	15	1.18	0.97	1.19	1.36	1.37	1.43	1.52	NC(=N[N+](=O)[O-])NCC([N+](=O)[O-])([N+](=O)[O-])[N+](=O)[O-]
bis-(trinitroethyl)-oxalate	2	782.9	15	1.18	0.91	0.95	1.34	1.37	1.32	1.36	O=C(OCC([N+](=O)[O-])([N+](=O)[O-])[N+](=O)[O-])C(=O)OCC([N+](=O)[O-])([N+](=O)[O-])[N+](=O)[O-]
2',2',2'-trinitroethyl-2,5-dinitrazahexanoate	2	437.1	15	1.18	1.26	1.34	1.5	1.5	1.47	1.58	CN(CCN(C(=O)OCC([N+](=O)[O-])([N+](=O)[O-])[N+](=O)[O-])[N+](=O)[O-])[N+](=O)[O-]
trinitroethyl-2,2-dinitropropylcarbonate	2	723.2	15	1.18	1.6	1.56	1.56	1.59	1.55	1.56	CC(COC(=O)OCC([N+](=O)[O-])([N+](=O)[O-])[N+](=O)[O-])([N+](=O)[O-])[N+](=O)[O-]
bis-(2,2,2-trinitroethyl)-carbonate	2	650.1	16	1.2	0.86	0.9	1.25	1.28	1.24	1.29	O=C(OCC([N+](=O)[O-])([N+](=O)[O-])[N+](=O)[O-])OCC([N+](=O)[O-])([N+](=O)[O-])[N+](=O)[O-]
1,4-bis-(5,5,5-trinitro-2-nitrazapentanoate)-2-butyne	2	662.7	16	1.2	1.11	1.17	1.38	1.39	1.3	1.4	O=C(OC#COC(=O)N(CCC([N+](=O)[O-])([N+](=O)[O-])[N+](=O)[O-])[N+](=O)[O-])N(CCC([N+](=O)[O-])([N+](=O)[O-])[N+](=O)[O-])[N+](=O)[O-]
2,2-dinitropropyl-5,5,5-trinitro-2-nitrazapentanoate	2	544.4	16	1.2	1.5	1.59	1.45	1.47	1.42	1.48	CC(COC(=O)N(CCC([N+](=O)[O-])([N+](=O)[O-])[N+](=O)[O-])[N+](=O)[O-])([N+](=O)[O-])[N+](=O)[O-]
Azidopentanitrobenzene	2	-227.6	17	1.23	0.84	0.9	0.88	0.91	0.94	1.02	[N-]=[N+]=Nc1c([N+](=O)[O-])c([N+](=O)[O-])c([N+](=O)[O-])c([N+](=O)[O-])c1[N+](=O)[O-]
5-Nitro-2-nitratomethyl-1,2,3,4-tetrazole	2	-116.2	17	1.23	1.17	1.21	0.96	0.99	1.16	1.09	O=[N+]([O-])OCn1nnc([N+](=O)[O-])n1
bis-(trinitroethyl)-2,5,8-trinitrazanonanedioate	2	813.8	17	1.23	1.16	1.18	1.38	1.39	1.29	1.41	O=C(OCC([N+](=O)[O-])([N+](=O)[O-])[N+](=O)[O-])N(CCN(CCN(C(=O)OCC([N+](=O)[O-])([N+](=O)[O-])[N+](=O)[O-])[N+](=O)[O-])[N+](=O)[O-])[N+](=O)[O-]
N-methyl-N-nitro-(trinitroethyl)-carbamate	2	447.4	17	1.23	0.9	1.1	1.36	1.38	1.41	1.49	CN(C(=O)OCC([N+](=O)[O-])([N+](=O)[O-])[N+](=O)[O-])[N+](=O)[O-]
N,N'-bis-(2,2,2-trinitroethyl)-urea	2	312.2	17	1.23	1.13	1.16	1.38	1.41	1.36	1.39	O=C(NCC([N+](=O)[O-])([N+](=O)[O-])[N+](=O)[O-])NCC([N+](=O)[O-])([N+](=O)[O-])[N+](=O)[O-]
2,2,2-Trinitroethyl-2,4,6,6-tetranitro-2,4-diazaheptanoate	2	482.4	18	1.26	1.11	1.18	1.28	1.29	1.23	1.35	CC(CN(CN(C(=O)OCC([N+](=O)[O-])([N+](=O)[O-])[N+](=O)[O-])[N+](=O)[O-])[N+](=O)[O-])([N+](=O)[O-])[N+](=O)[O-]
Pentanitrotoluene	2	115.6	18	1.26	1.42	1.43	1.28	1.3	1.32	1.36	Cc1c([N+](=O)[O-])c([N+](=O)[O-])c([N+](=O)[O-])c([N+](=O)[O-])c1[N+](=O)[O-]
2,2,2-trinitroethyl-4,4,4-trinitrobutyrate	2	476.8	18	1.26	1.14	1.17	1.35	1.38	1.34	1.37	O=C(CCC([N+](=O)[O-])([N+](=O)[O-])[N+](=O)[O-])OCC([N+](=O)[O-])([N+](=O)[O-])[N+](=O)[O-]
N-trinitroethyl-4,4,4-trinitrobutyramide	2	320.8	18	1.26	1.28	1.3	1.44	1.47	1.41	1.44	O=C(CCC([N+](=O)[O-])([N+](=O)[O-])[N+](=O)[O-])NCC([N+](=O)[O-])([N+](=O)[O-])[N+](=O)[O-]
Compound (2) in JOC 61,9340 (1996)	2	-281.8	19	1.28	1.58	1.51	1.36	1.34	1.36	1.58	O=[N+]([O-])N1CN([N+](=O)[O-])C2C1C1C2N([N+](=O)[O-])CN1[N+](=O)[O-]
1,1,1,3,6,9,12,14,14,14-decanitro-3,6,9,12-tetraza-tetradecane	2	25.2	19	1.28	1.38	1.36	1.32	1.32	1.2	1.34	O=[N+]([O-])N(CCN(CCN(CC([N+](=O)[O-])([N+](=O)[O-])[N+](=O)[O-])[N+](=O)[O-])[N+](=O)[O-])CCN(CC([N+](=O)[O-])([N+](=O)[O-])[N+](=O)[O-])[N+](=O)[O-]
1,1,1,18,18,18-hexanitro-3,16-dioxa-4,15-dioxo-5,8,11-14-tetranitrazaoctadecane	2	803.5	19	1.28	1.31	1.29	1.45	1.45	1.34	1.46	O=C(OCC([N+](=O)[O-])([N+](=O)[O-])[N+](=O)[O-])N(CCN(CCN(CCN(C(=O)OCC([N+](=O)[O-])([N+](=O)[O-])[N+](=O)[O-])[N+](=O)[O-])[N+](=O)[O-])[N+](=O)[O-])[N+](=O)[O-]
2,3,4,6-Tetranitrotoluene	2	95.7	19	1.28	1.73	1.72	1.54	1.56	1.61	1.61	Cc1c([N+](=O)[O-])cc([N+](=O)[O-])c([N+](=O)[O-])c1[N+](=O)[O-]
bis-(1,1,1-trinitro-2-propyl)-urea	2	353.5	19	1.28	1.52	1.53	1.71	1.74	1.65	1.65	CC(NC(=O)NC(C)C([N+](=O)[O-])([N+](=O)[O-])[N+](=O)[O-])C([N+](=O)[O-])([N+](=O)[O-])[N+](=O)[O-]
1,2,3-propanetriol trinitrate	2	368	20	1.3	1.07	1.1	0.97	0.97	1	1.62	O=[N+]([O-])OCC(CO[N+](=O)[O-])O[N+](=O)[O-]
2,2,2-trinitroethyl-3,3-dinitrobutyl nitramine	2	155.2	20	1.3	1.26	1.41	1.33	1.35	1.3	1.38	CC(CCN(CC([N+](=O)[O-])([N+](=O)[O-])[N+](=O)[O-])[N+](=O)[O-])([N+](=O)[O-])[N+](=O)[O-]
4,4'-Diamino-2,2',3,3',4,4',5,5',6,6'-octanitrobiphenyl	2	100.2	20	1.3	1.45	1.45	1.37	1.39	1.29	1.33	Nc1c([N+](=O)[O-])c([N+](=O)[O-])c(-c2c([N+](=O)[O-])c([N+](=O)[O-])c(N)c([N+](=O)[O-])c2[N+](=O)[O-])c([N+](=O)[O-])c1[N+](=O)[O-]
Compound (1) in PEP 19,249 (1994)	2	249.1	20	1.3	1.52	1.63	1.45	1.45	1.39	1.66	O=[N+]([O-])OCCNc1c([N+](=O)[O-])cc([N+](=O)[O-])c(N(CCO[N+](=O)[O-])[N+](=O)[O-])c1[N+](=O)[O-]
2,5-dipicryl-1,3,4-oxadiazole	2	-74.1	20	1.3	1.8	1.78	1.55	1.54	1.44	1.31	O=[N+]([O-])c1cc([N+](=O)[O-])c(-c2nnc(-c3c([N+](=O)[O-])cc([N+](=O)[O-])cc3[N+](=O)[O-])o2)c([N+](=O)[O-])c1
N-nitro-N,N'-bis-(trinitropropyl)-urea	2	319.6	21	1.32	1.17	1.29	1.4	1.42	1.34	1.41	O=C(NCCC([N+](=O)[O-])([N+](=O)[O-])[N+](=O)[O-])N(CCC([N+](=O)[O-])([N+](=O)[O-])[N+](=O)[O-])[N+](=O)[O-]
3,5,5-trinitro-3-azahexyl nitrate	2	235.4	21	1.32	1.42	1.6	1.4	1.41	1.41	1.63	CC(CN(CCO[N+](=O)[O-])[N+](=O)[O-])([N+](=O)[O-])[N+](=O)[O-]
N-Methyl-2-amino-N,3,4,5,6-pentanitrotoluene	2	75.6	21	1.32	1.49	1.62	1.46	1.47	1.46	1.53	Cc1c(N(C)[N+](=O)[O-])c([N+](=O)[O-])c([N+](=O)[O-])c([N+](=O)[O-])c1[N+](=O)[O-]
1,1,1,3,6,6,8,10,10,13,15,15,15-tridecanitro-3,8,13-triazapentadecane	2	158.1	23	1.36	1.24	1.26	1.19	1.21	1.08	1.2	O=[N+]([O-])N(CC(CCN(CC([N+](=O)[O-])([N+](=O)[O-])[N+](=O)[O-])[N+](=O)[O-])([N+](=O)[O-])[N+](=O)[O-])CC(CCN(CC([N+](=O)[O-])([N+](=O)[O-])[N+](=O)[O-])[N+](=O)[O-])([N+](=O)[O-])[N+](=O)[O-]
2',2',2'-Trinitroethyl-2,4,6-trinitrobenzoate	2	396.2	24	1.38	1.34	1.35	1.41	1.44	1.39	1.42	O=C(OCC([N+](=O)[O-])([N+](=O)[O-])[N+](=O)[O-])c1c([N+](=O)[O-])cc([N+](=O)[O-])cc1[N+](=O)[O-]
trinitroethyl-5,5-dinitro-3-nitrazahexanoate	2	487.4	25	1.4	1.22	1.35	1.45	1.47	1.41	1.48	CC(CN(CC(=O)OCC([N+](=O)[O-])([N+](=O)[O-])[N+](=O)[O-])[N+](=O)[O-])([N+](=O)[O-])[N+](=O)[O-]
2,3,5,6-Tetranitrotoluene	2	95.7	25	1.4	1.73	1.72	1.53	1.55	1.6	1.6	Cc1c([N+](=O)[O-])c([N+](=O)[O-])cc([N+](=O)[O-])c1[N+](=O)[O-]
Compound (15) in PEP 39,90 (2014)	2	973.5	25	1.4	1.76	1.14	1.59	1.57	1.56	1.75	COC(=O)C12N([N+](=O)[O-])C(=O)N([N+](=O)[O-])C1(C(=O)OC)N([N+](=O)[O-])C(=O)N2[N+](=O)[O-]
1,2,4,5-tetranitrobenzene	2	56.1	27	1.43	1.45	1.45	1.26	1.29	1.37	1.4	O=[N+]([O-])c1cc([N+](=O)[O-])c([N+](=O)[O-])cc1[N+](=O)[O-]
Compound (24) in PEP 19,249 (1994)	2	351.6	27	1.43	1.59	1.62	1.42	1.41	1.28	1.46	O=[N+]([O-])OCCNc1c([N+](=O)[O-])c(-c2nnc(-c3c([N+](=O)[O-])c(NCCO[N+](=O)[O-])c([N+](=O)[O-])c(N(CCO[N+](=O)[O-])[N+](=O)[O-])c3[N+](=O)[O-])o2)c([N+](=O)[O-])c(N(CCO[N+](=O)[O-])[N+](=O)[O-])c1[N+](=O)[O-]
methylene-bis-(trinitroethyl)-carbamate	2	888.2	27	1.43	1.21	1.24	1.69	1.72	1.64	1.64	O=C(NCNC(=O)OCC([N+](=O)[O-])([N+](=O)[O-])[N+](=O)[O-])OCC([N+](=O)[O-])([N+](=O)[O-])[N+](=O)[O-]
2,4,6-trinitrophloroglucinol	2	653.2	27	1.43	1.4	1.4	1.79	1.82	1.86	1.83	O=[N+]([O-])c1c(O)c([N+](=O)[O-])c(O)c([N+](=O)[O-])c1O
methyl-2,2,2-trinitro-ethyl carbonate	2	652.3	28	1.45	1.25	1.26	1.8	1.83	1.88	1.84	COC(=O)OCC([N+](=O)[O-])([N+](=O)[O-])[N+](=O)[O-]
cyclotetrametylene-tetranitramine	2	-113.9	29	1.46	1.34	1.28	1.21	1.18	1.22	1.45	O=[N+]([O-])N1CN([N+](=O)[O-])CN([N+](=O)[O-])CN([N+](=O)[O-])C1
2,2,4,4,6,6-hexanitroheptane	2	299.9	29	1.46	1.62	1.62	1.41	1.45	1.39	1.42	CC(CC(CC(C)([N+](=O)[O-])[N+](=O)[O-])([N+](=O)[O-])[N+](=O)[O-])([N+](=O)[O-])[N+](=O)[O-]
N-(trinitropropyl)-3,3,5,5-tetranitro-piperdine	2	168.2	29	1.46	1.52	1.53	1.45	1.48	1.4	1.43	O=[N+]([O-])C1([N+](=O)[O-])CN(CCC([N+](=O)[O-])([N+](=O)[O-])[N+](=O)[O-])CC([N+](=O)[O-])([N+](=O)[O-])C1
bis-(2,2,2-trinitroethyl)-3,6-dintraza-1,8-octanedioate	2	762.3	29	1.46	1.24	1.3	1.51	1.53	1.43	1.51	O=C(CN(CCN(CC(=O)OCC([N+](=O)[O-])([N+](=O)[O-])[N+](=O)[O-])[N+](=O)[O-])[N+](=O)[O-])OCC([N+](=O)[O-])([N+](=O)[O-])[N+](=O)[O-]
3,5-dinitroisoxazole	2	24.5	29	1.46	1.24	1.26	1.57	1.6	1.91	1.87	O=[N+]([O-])c1cc([N+](=O)[O-])on1
4,4,4-trinitrobutyric anhydride	2	714.6	30	1.48	1.36	1.37	1.61	1.64	1.57	1.57	O=C(CCC([N+](=O)[O-])([N+](=O)[O-])[N+](=O)[O-])OC(=O)CCC([N+](=O)[O-])([N+](=O)[O-])[N+](=O)[O-]
bis-(2,2,2-trinitroethyl)-succinate	2	835.1	30	1.48	1.29	1.31	1.64	1.67	1.6	1.6	O=C(CCC(=O)OCC([N+](=O)[O-])([N+](=O)[O-])[N+](=O)[O-])OCC([N+](=O)[O-])([N+](=O)[O-])[N+](=O)[O-]
3,4-Bis(4-nitro-1,2,5-oxadiazol-3-yl)-1,2,5-oxadiazole-2-oxide	2	-489.5	31	1.49	1.32	1.34	1.4	0.3	0.37	0.19	O=[N+]([O-])c1nonc1-c1no[n+]([O-])c1-c1nonc1[N+](=O)[O-]
1-(2,2,2-Trinitroethyl)-2,4,6-trinitrobenzene	2	44.1	31	1.49	1.65	1.65	1.5	1.53	1.52	1.53	O=[N+]([O-])c1ccc(CC([N+](=O)[O-])([N+](=O)[O-])[N+](=O)[O-])c([N+](=O)[O-])c1
1-(3,3,3-trinitropropyl)-2,4-dinitrobenzene	2	70.2	31	1.49	1.86	1.85	1.7	1.73	1.69	1.68	O=[N+]([O-])c1ccc(CCC([N+](=O)[O-])([N+](=O)[O-])[N+](=O)[O-])c([N+](=O)[O-])c1
1-(3'-Amino-2',4',6'-trinitrophenyl)-1,2,3-triazole	2	-187.2	31	1.49	1.82	1.81	1.86	1.91	1.94	1.62	Nc1c([N+](=O)[O-])cc([N+](=O)[O-])c(-n2ccnn2)c1[N+](=O)[O-]
Tetryl	2	16.1	32	1.51	1.52	1.69	1.49	1.5	1.54	1.61	CN(c1c([N+](=O)[O-])cc([N+](=O)[O-])cc1[N+](=O)[O-])[N+](=O)[O-]
1,1,1,3-tetranitrobutane	2	145	33	1.52	1.46	1.48	1.44	1.47	1.52	1.54	CC(CC([N+](=O)[O-])([N+](=O)[O-])[N+](=O)[O-])[N+](=O)[O-]
2,6-bis-(picrylazo)-3,5-dinitropyridine	2	-439.6	33	1.52	1.76	1.75	1.8	1.83	1.66	1.65	O=[N+]([O-])c1cc([N+](=O)[O-])c(N=Nc2nc(N=Nc3c([N+](=O)[O-])cc([N+](=O)[O-])cc3[N+](=O)[O-])c([N+](=O)[O-])cc2[N+](=O)[O-])c([N+](=O)[O-])c1
1,4,5,8-Âtetranitro-hexahydropyrazino[2,3:b]piperazine	2	-114.6	35	1.54	1.7	1.62	1.46	1.44	1.44	1.65	O=[N+]([O-])N1CCN([N+](=O)[O-])C2C1N([N+](=O)[O-])CCN2[N+](=O)[O-]
5,6-dinitro-1-picryl-benzotriazole	2	-212.9	35	1.54	1.56	1.7	1.55	1.59	1.53	1.35	O=[N+]([O-])c1cc([N+](=O)[O-])c(-n2nnc3cc([N+](=O)[O-])c([N+](=O)[O-])cc32)c([N+](=O)[O-])c1
1-picryl-4-picrylamino-1,2,3-triazole	2	-222.1	35	1.54	1.64	1.75	1.66	1.7	1.58	1.42	O=[N+]([O-])c1cc([N+](=O)[O-])c(Nc2cn(-c3c([N+](=O)[O-])cc([N+](=O)[O-])cc3[N+](=O)[O-])nn2)c([N+](=O)[O-])c1
2,2,2-trinitroethyl-4-nitrazavalerate	2	452.2	35	1.54	1.44	1.6	1.78	1.79	1.78	1.82	CCN(CC(=O)OCC([N+](=O)[O-])([N+](=O)[O-])[N+](=O)[O-])[N+](=O)[O-]
4-(2-nitroethyl)-3,5-dinitro-1,2,4-triazole	2	-25.3	35	1.54	1.79	1.72	1.82	1.35	1.47	1.24	O=[N+]([O-])CCn1c([N+](=O)[O-])nnc1[N+](=O)[O-]
5-picrylaminotetrazole	2	-255.8	36	1.56	1.92	1.91	1.35	1.84	1.9	1.57	O=[N+]([O-])c1cc([N+](=O)[O-])c(Nc2nnn[nH]2)c([N+](=O)[O-])c1
2,4,6-trinitrobenzaldehyde	2	185.7	36	1.56	1.52	1.14	1.77	1.8	1.88	1.85	O=Cc1c([N+](=O)[O-])cc([N+](=O)[O-])cc1[N+](=O)[O-]
2,2,5,7,7,9,12,12-octanitro-5,9-diazatridecane	2	279.4	37	1.57	1.74	1.78	1.56	1.57	1.49	1.56	CC(CCN(CC(CN(CCC(C)([N+](=O)[O-])[N+](=O)[O-])[N+](=O)[O-])([N+](=O)[O-])[N+](=O)[O-])[N+](=O)[O-])([N+](=O)[O-])[N+](=O)[O-]
2,2,4,4,6,6-Hexanitroazobenzene	2	-173.5	37	1.57	1.74	1.73	1.65	1.68	1.6	1.6	O=[N+]([O-])c1cc([N+](=O)[O-])c(N=Nc2c([N+](=O)[O-])cc([N+](=O)[O-])cc2[N+](=O)[O-])c([N+](=O)[O-])c1
4,4',5,5'-tetranitrobiimidazole	2	49.3	37	1.57	1.44	1.46	1.64	1.67	1.71	1.7	O=[N+]([O-])c1nc(-c2nc([N+](=O)[O-])c([N+](=O)[O-])[nH]2)[nH]c1[N+](=O)[O-]
3-Amino-2,4,5,6-tetranitrotoluene	2	121.1	37	1.57	1.78	1.77	1.7	1.73	1.75	1.74	Cc1c([N+](=O)[O-])c(N)c([N+](=O)[O-])c([N+](=O)[O-])c1[N+](=O)[O-]
1,7-dipicrylbenzo-[1,2-d:4,5-d']-bistriazole	2	-481.9	38	1.58	1.87	1.8	1.71	1.76	1.59	1.32	O=[N+]([O-])c1cc([N+](=O)[O-])c(-n2nnc3cc4nnn(-c5c([N+](=O)[O-])cc([N+](=O)[O-])cc5[N+](=O)[O-])c4cc32)c([N+](=O)[O-])c1
2,2',2",4,4',4",6,6',6"-nonanitro-m-terphenyl	2	-17.2	39	1.59	1.73	1.71	1.48	1.51	1.37	1.4	O=[N+]([O-])c1cc([N+](=O)[O-])c(-c2c([N+](=O)[O-])cc([N+](=O)[O-])c(-c3c([N+](=O)[O-])cc([N+](=O)[O-])cc3[N+](=O)[O-])c2[N+](=O)[O-])c([N+](=O)[O-])c1
N,N'-dinitro-N-[2-(nitroamino)ethyl]-1,2-ethanediamine	2	53.7	39	1.59	1.75	1.75	1.61	1.58	1.63	1.82	O=[N+]([O-])NCCN(CCN[N+](=O)[O-])[N+](=O)[O-]
Nitrocellulose (NC)	2	1221.5	39	1.59	1.45	1.45	1.49	1.49	1.45	2.01	O=[N+]([O-])OCC1OC2OC3C(CO[N+](=O)[O-])OC(OC1C(O[N+](=O)[O-])C2O[N+](=O)[O-])C(O[N+](=O)[O-])C3O[N+](=O)[O-]
2,2',4,4',6,6'-Hexanitrodiphenylmethane	2	35.6	39	1.59	1.92	1.9	1.68	1.7	1.62	1.62	O=[N+]([O-])c1cc([N+](=O)[O-])c(Cc2c([N+](=O)[O-])cc([N+](=O)[O-])cc2[N+](=O)[O-])c([N+](=O)[O-])c1
hexanitrostilbene	2	-57.7	39	1.59	1.83	1.25	1.74	1.77	1.68	1.67	O=[N+]([O-])c1cc([N+](=O)[O-])c(C=Cc2c([N+](=O)[O-])cc([N+](=O)[O-])cc2[N+](=O)[O-])c([N+](=O)[O-])c1
dodecanitroquaterphenyl	2	-43.9	40	1.6	1.71	1.7	1.46	1.49	1.32	1.35	O=[N+]([O-])c1cc([N+](=O)[O-])c(-c2c([N+](=O)[O-])cc([N+](=O)[O-])c(-c3c([N+](=O)[O-])cc([N+](=O)[O-])c(-c4c([N+](=O)[O-])cc([N+](=O)[O-])cc4[N+](=O)[O-])c3[N+](=O)[O-])c2[N+](=O)[O-])c([N+](=O)[O-])c1
1-Picryl-5,7-dinitrobenzotriazole (BTX)	2	-212.9	40	1.6	1.56	1.7	1.55	1.59	1.53	1.35	O=[N+]([O-])c1cc([N+](=O)[O-])c(-n2nnc3cc([N+](=O)[O-])cc([N+](=O)[O-])c32)c([N+](=O)[O-])c1
3,3'-dihydroxy-2,2',4,4',6,6'-hexanitrobiphenyl	2	420.8	40	1.6	1.59	1.59	1.57	1.6	1.53	1.54	O=[N+]([O-])c1cc([N+](=O)[O-])c(-c2c([N+](=O)[O-])cc([N+](=O)[O-])c(O)c2[N+](=O)[O-])c([N+](=O)[O-])c1O
1,5-dipicrylbenzo-[1,2-d:4,5-d']-bistriazole	2	-481.9	40	1.6	1.87	1.8	1.71	1.76	1.59	1.32	O=[N+]([O-])c1cc([N+](=O)[O-])c(-n2nnc3cc4c(cc32)nnn4-c2c([N+](=O)[O-])cc([N+](=O)[O-])cc2[N+](=O)[O-])c([N+](=O)[O-])c1
trinitroethyl-2-methoxy-ethylnitramine	2	230.9	42	1.62	1.42	1.6	1.68	1.69	1.7	1.75	COCCN(CC([N+](=O)[O-])([N+](=O)[O-])[N+](=O)[O-])[N+](=O)[O-]
2,4,6-trinitrobenzaldoxime	2	38.3	42	1.62	1.59	1.23	1.98	2.01	2.08	2.02	O=[N+]([O-])c1cc([N+](=O)[O-])c(C=NO)c([N+](=O)[O-])c1
2,4,6-trinitroresorcinol	2	447.5	43	1.63	1.53	1.53	1.73	1.76	1.83	1.8	O=[N+]([O-])c1cc([N+](=O)[O-])c(O)c([N+](=O)[O-])c1O
Compound (2) in PEP 19,249 (1994)	2	422.8	43	1.63	1.92	1.91	1.78	1.79	1.7	2	O=[N+]([O-])OCCNc1c([N+](=O)[O-])c(NCCO[N+](=O)[O-])c([N+](=O)[O-])c(NCCO[N+](=O)[O-])c1[N+](=O)[O-]
2,4,6-Trinitrobenzyl chloride	2	106.1	44	1.64	1.71	1.97	1.9	1.92	2.01	1.96	O=[N+]([O-])c1cc([N+](=O)[O-])c(CCl)c([N+](=O)[O-])c1
N,N'-bis-(3,3,3-trinitropropyl)-oxamide	2	523	45	1.65	1.52	1.53	1.78	1.81	1.72	1.71	O=C(NCCC([N+](=O)[O-])([N+](=O)[O-])[N+](=O)[O-])C(=O)NCCC([N+](=O)[O-])([N+](=O)[O-])[N+](=O)[O-]
4-Amino-2,3,5,6-tetranitrotoluene	2	121.1	47	1.67	1.78	1.77	1.69	1.72	1.75	1.73	Cc1c([N+](=O)[O-])c([N+](=O)[O-])c(N)c([N+](=O)[O-])c1[N+](=O)[O-]
2,2,6,9,9-pentanitro-4-oxa-5-oxo-6-azadecane	2	617.5	47	1.67	1.92	2	1.75	1.76	1.72	1.75	CC(CCN(C(=O)OCC(C)([N+](=O)[O-])[N+](=O)[O-])[N+](=O)[O-])([N+](=O)[O-])[N+](=O)[O-]
2,2',4,4',6,6'-hexanitrobiphenylamine	2	16.7	48	1.68	1.79	1.78	1.63	1.65	1.58	1.58	O=[N+]([O-])c1cc([N+](=O)[O-])c(Nc2c([N+](=O)[O-])cc([N+](=O)[O-])cc2[N+](=O)[O-])c([N+](=O)[O-])c1
1-Methyl-2,4,5-trinitroimidazole	2	60.4	49	1.69	1.73	1.96	1.61	1.64	1.79	1.77	Cn1c([N+](=O)[O-])nc([N+](=O)[O-])c1[N+](=O)[O-]
2,2-Dinitropropane-1,3-diol-bis-(4,4,4-trinitrobutyrate)	2	922.6	50	1.7	1.43	1.44	1.64	1.67	1.56	1.57	O=C(CCC([N+](=O)[O-])([N+](=O)[O-])[N+](=O)[O-])OCC(COC(=O)CCC([N+](=O)[O-])([N+](=O)[O-])[N+](=O)[O-])([N+](=O)[O-])[N+](=O)[O-]
benzotrifuroxan	2	-481.2	50	1.7	1.75	2.11	2.29	1.65	1.8	1.69	[O-][n+]1onc2c1c1no[n+]([O-])c1c1no[n+]([O-])c21
Compound (5) in PEP 19,249 (1994)	2	215.9	50	1.7	2.35	1.95	1.97	1.98	1.94	2.07	Nc1c([N+](=O)[O-])c(N)c([N+](=O)[O-])c(NCCO[N+](=O)[O-])c1[N+](=O)[O-]
1-(3',4'-dinitrophenyl)-4-nitro-1,2,3-triazole	2	-202.5	51	1.71	1.56	1.76	1.69	1.74	1.8	1.5	O=[N+]([O-])c1cn(-c2ccc([N+](=O)[O-])c([N+](=O)[O-])c2)nn1
2,4,6-Trinitrobenzylalcohol	2	241.7	52	1.72	1.98	1.95	1.94	1.97	2.03	1.98	O=[N+]([O-])c1cc([N+](=O)[O-])c(CO)c([N+](=O)[O-])c1
N,N'-dinitro-N,N'-bis-[2-(nitroamino)ethyl]-1,2-ethanediamine	2	43.4	53	1.72	1.93	1.85	1.68	1.65	1.63	1.82	O=[N+]([O-])NCCN(CCN(CCN[N+](=O)[O-])[N+](=O)[O-])[N+](=O)[O-]
3-methyl-2,2',4,4',6,6'-hexanitrobiphenyl	2	49.1	53	1.72	1.92	1.9	1.68	1.7	1.62	1.62	Cc1c([N+](=O)[O-])cc([N+](=O)[O-])c(-c2c([N+](=O)[O-])cc([N+](=O)[O-])cc2[N+](=O)[O-])c1[N+](=O)[O-]
1,4-Dinitroimidazole	2	-37.9	55	1.74	1.57	1.58	1.4	1.39	1.69	1.8	O=[N+]([O-])c1cn([N+](=O)[O-])cn1
2,3,4-Trinitrotoluene	2	75.8	56	1.75	2.16	2.13	1.93	1.95	2.06	2	Cc1ccc([N+](=O)[O-])c([N+](=O)[O-])c1[N+](=O)[O-]
8-Amino-7-nitrobenzobisfuroxan	2	-283.3	56	1.75	1.9	2.07	2.19	1.85	1.96	1.86	Nc1c([N+](=O)[O-])c2no[n+]([O-])c2c2no[n+]([O-])c12
3,3',5,5'-tetranitro-2,2'-azopyridine	2	-306.5	56	1.75	1.96	1.94	2.16	2.18	2.16	2.09	O=[N+]([O-])c1cnc(N=Nc2ncc([N+](=O)[O-])cc2[N+](=O)[O-])c([N+](=O)[O-])c1
2,4,6,4',2",4",6"-heptanitro-2',6'-diaza-m-terphenyl	2	-141.1	58	1.76	1.87	1.86	1.74	1.77	1.64	1.64	O=[N+]([O-])c1cc([N+](=O)[O-])c(-c2ncc([N+](=O)[O-])c(-c3c([N+](=O)[O-])cc([N+](=O)[O-])cc3[N+](=O)[O-])n2)c([N+](=O)[O-])c1
2,2',2",4,4",6,6',6"-octanitro-p-terphenyl	2	-37.1	59	1.77	1.89	1.87	1.63	1.66	1.52	1.54	O=[N+]([O-])c1cc([N+](=O)[O-])c(-c2cc([N+](=O)[O-])c(-c3c([N+](=O)[O-])cc([N+](=O)[O-])cc3[N+](=O)[O-])c([N+](=O)[O-])c2)c([N+](=O)[O-])c1
3-nitro-4-picrylaminofurazan	2	-142.5	60	1.78	1.62	1.62	1.48	1.11	1.1	0.99	O=[N+]([O-])c1cc([N+](=O)[O-])c(Nc2nonc2[N+](=O)[O-])c([N+](=O)[O-])c1
bis(2-fluoro-2,2-dinitroethyl)formal (FEFO)	2	834	60	1.78	1.13	1.39	1.63	1.66	1.63	1.63	O=[N+]([O-])C(F)(COCOCC(F)([N+](=O)[O-])[N+](=O)[O-])[N+](=O)[O-]
,4,6,8-tetraazabicyclo[3.3.0]octane-3-one (HK-55)	2	85.8	61	1.79	1.23	1.25	1.35	1.33	1.4	1.61	O=C1NC2C(N([N+](=O)[O-])CN2[N+](=O)[O-])N1[N+](=O)[O-]
Compound (21) in PEP 19,249 (1994)	2	26.3	61	1.79	1.68	1.22	1.51	1.52	1.41	1.55	O=[N+]([O-])OCCN(c1c([N+](=O)[O-])cc([N+](=O)[O-])c(C=Cc2c([N+](=O)[O-])cc([N+](=O)[O-])cc2[N+](=O)[O-])c1[N+](=O)[O-])[N+](=O)[O-]
2,2",4,4',4",6,6',6"-octanitro-m-terphenyl	2	-37.1	63	1.8	1.89	1.87	1.63	1.66	1.52	1.54	O=[N+]([O-])c1cc([N+](=O)[O-])c(-c2cc(-c3c([N+](=O)[O-])cc([N+](=O)[O-])cc3[N+](=O)[O-])c([N+](=O)[O-])cc2[N+](=O)[O-])c([N+](=O)[O-])c1
Compound (16) in PEP 39,90 (2014)	2	1044.9	63	1.8	2.06	1.47	1.87	1.85	1.83	1.99	CCOC(=O)C12N([N+](=O)[O-])C(=O)N([N+](=O)[O-])C1(C(=O)OCC)N([N+](=O)[O-])C(=O)N2[N+](=O)[O-]
3,3,9,9-tetranitro-1,5,7,11-tetraoxaspiro-(5.5)-undecane	2	869.2	66	1.82	1.52	1.52	1.88	1.91	1.87	1.84	O=[N+]([O-])C1([N+](=O)[O-])COC2(OC1)OCC([N+](=O)[O-])([N+](=O)[O-])CO2
3-nitro-1-picryl-1,2,4-triazole	2	-132.6	68	1.83	1.89	1.83	1.82	1.84	1.87	1.84	O=[N+]([O-])c1cc([N+](=O)[O-])c(-n2cnc([N+](=O)[O-])n2)c([N+](=O)[O-])c1
2-(2,4,6-Trinitrobenzene) ethanol	2	267.8	68	1.83	2.25	2.21	2.19	2.21	2.24	2.16	O=[N+]([O-])c1cc([N+](=O)[O-])c(CCO)c([N+](=O)[O-])c1
3,4-bis-(picrylamino)-furazan	2	-181.9	71	1.85	1.85	1.84	1.76	1.48	1.36	1.26	O=[N+]([O-])c1cc([N+](=O)[O-])c(Nc2nonc2Nc2c([N+](=O)[O-])cc([N+](=O)[O-])cc2[N+](=O)[O-])c([N+](=O)[O-])c1
N,N-bis-(2,2-dinitropropyl)-4,4,4-trinitrobutyramide	2	448.2	72	1.86	1.76	1.76	1.73	1.76	1.66	1.66	CC(CN(CC(C)([N+](=O)[O-])[N+](=O)[O-])C(=O)CCC([N+](=O)[O-])([N+](=O)[O-])[N+](=O)[O-])([N+](=O)[O-])[N+](=O)[O-]
2,2-dinitropropyl-4,4,4-trinitrobutyramide	2	393.9	72	1.86	1.72	1.72	1.77	1.8	1.75	1.73	CC(CNC(=O)CCC([N+](=O)[O-])([N+](=O)[O-])[N+](=O)[O-])([N+](=O)[O-])[N+](=O)[O-]
2',2',2'-trinitroethyl-3,5-dinitrobenzoate	2	376.3	73	1.86	1.55	1.55	1.63	1.66	1.62	1.62	O=C(OCC([N+](=O)[O-])([N+](=O)[O-])[N+](=O)[O-])c1cc([N+](=O)[O-])cc([N+](=O)[O-])c1
1-Methoxy-3,5-dichloro-2,4,6-trinitrobenzene	2	275.7	75	1.88	1.46	1.85	1.93	1.95	2	1.96	COc1c([N+](=O)[O-])c(Cl)c([N+](=O)[O-])c(Cl)c1[N+](=O)[O-]
3,5-dimethyl-2,4,6-trinitrophenol	2	321	77	1.89	2.25	2.21	2.18	2.21	2.23	2.15	Cc1c([N+](=O)[O-])c(C)c([N+](=O)[O-])c(O)c1[N+](=O)[O-]
2,4,6-Trinitro-1-chlorobenzene	2	67.6	79	1.9	1.42	1.71	1.6	1.63	1.77	1.75	O=[N+]([O-])c1cc([N+](=O)[O-])c(Cl)c([N+](=O)[O-])c1
N,N'-dimethyl-N,N'-dinitrooxamide	2	385.4	79	1.9	1.42	1.54	1.8	1.78	1.87	2.03	CN(C(=O)C(=O)N(C)[N+](=O)[O-])[N+](=O)[O-]
2,4,6-Trinitro-acetylbenzene	2	234.9	79	1.9	2.1	2.07	2.03	2.06	2.11	2.05	CC(=O)c1c([N+](=O)[O-])cc([N+](=O)[O-])cc1[N+](=O)[O-]
2-Nitroimino-5-nitrohexahydro-1,3,5-triazine	2	-60.1	80	1.9	1.56	1.7	1.81	1.78	1.95	2.09	O=[N+]([O-])N=C1NCN([N+](=O)[O-])CN1
3,3,4,4-tetranitrohexane	2	264.7	80	1.9	2.03	2.02	1.74	1.77	1.75	1.73	CCC([N+](=O)[O-])([N+](=O)[O-])C(CC)([N+](=O)[O-])[N+](=O)[O-]
N-(2,2-dinitrobutyl)-N-2,2-trinitro-1-butanamine	2	254.4	80	1.9	1.92	2.05	1.77	1.79	1.73	1.77	CCC(CN(CC(CC)([N+](=O)[O-])[N+](=O)[O-])[N+](=O)[O-])([N+](=O)[O-])[N+](=O)[O-]
ethyl-2,2,2-trinitroethylcarbonate	2	688	81	1.91	1.56	1.56	2.05	2.08	2.1	2.04	CCOC(=O)OCC([N+](=O)[O-])([N+](=O)[O-])[N+](=O)[O-]
2,2',4,4',6,6'-hexanitrobiphenyl	2	9.5	85	1.93	1.76	1.74	1.51	1.54	1.48	1.5	O=[N+]([O-])c1cc([N+](=O)[O-])c(-c2c([N+](=O)[O-])cc([N+](=O)[O-])cc2[N+](=O)[O-])c([N+](=O)[O-])c1
1,3,7,9-Tetranitrodibenzo-1,3a,4,6a-tetrazapentalene	2	-293.1	85	1.93	1.74	1.66	2.29	2.32	2.27	2.19	O=[N+]([O-])c1cc([N+](=O)[O-])c2n[n+]3c4cc([N+](=O)[O-])cc([N+](=O)[O-])c4[n-]n3c2c1
4,4,8,8-Tetranitro-1,11-dinitrato-6-nitrazaundecane	2	443.5	87	1.94	1.62	1.71	1.47	1.48	1.42	1.65	O=[N+]([O-])OCCC(CCN(CCC(CCO[N+](=O)[O-])([N+](=O)[O-])[N+](=O)[O-])[N+](=O)[O-])([N+](=O)[O-])[N+](=O)[O-]
picric acid	2	241.9	87	1.94	1.68	1.67	1.67	1.7	1.8	1.78	O=[N+]([O-])c1cc([N+](=O)[O-])c(O)c([N+](=O)[O-])c1
1,3,5-Âtrinitro-2,4,6-Âtripicryl benzene (BRX)	2	-43.9	89	1.95	1.71	1.7	1.46	1.49	1.32	1.35	O=[N+]([O-])c1cc([N+](=O)[O-])c(-c2c([N+](=O)[O-])c(-c3c([N+](=O)[O-])cc([N+](=O)[O-])cc3[N+](=O)[O-])c([N+](=O)[O-])c(-c3c([N+](=O)[O-])cc([N+](=O)[O-])cc3[N+](=O)[O-])c2[N+](=O)[O-])c([N+](=O)[O-])c1
N,N'-dinitro-N,N'-bis-(3-nitrazabutyl)-oxamide	2	364.8	90	1.95	1.89	1.81	1.83	1.8	1.78	1.94	CN(CCN(C(=O)C(=O)N(CCN(C)[N+](=O)[O-])[N+](=O)[O-])[N+](=O)[O-])[N+](=O)[O-]
Methyl-2,4,6-trinitrobenzoate	2	398.4	90	1.95	1.94	1.92	2.07	2.1	2.12	2.06	COC(=O)c1c([N+](=O)[O-])cc([N+](=O)[O-])cc1[N+](=O)[O-]
3,5-bis-(picrylamino)-2,6-dinitropyridine	2	-59.3	92	1.96	1.84	1.83	1.76	1.78	1.63	1.63	O=[N+]([O-])c1cc([N+](=O)[O-])c(Nc2cc(Nc3c([N+](=O)[O-])cc([N+](=O)[O-])cc3[N+](=O)[O-])c([N+](=O)[O-])nc2[N+](=O)[O-])c([N+](=O)[O-])c1
1,3,5-trinitrobenzene	2	36.2	100	2	1.85	1.83	1.62	1.65	1.79	1.77	O=[N+]([O-])c1cc([N+](=O)[O-])cc([N+](=O)[O-])c1
1,4,5,8-tetranitronaphthalene	2	-3.1	100	2	2.06	2.03	1.79	1.81	1.83	1.81	O=[N+]([O-])c1ccc([N+](=O)[O-])c2c([N+](=O)[O-])ccc([N+](=O)[O-])c12
1,4-dinitroglycoluril	2	333	100	2	1.25	1.38	1.81	1.79	1.89	2.04	O=C1NC2C(NC(=O)N2[N+](=O)[O-])N1[N+](=O)[O-]
7-Amino-4,6-dinitrobenzofuroxan	2	-110.8	100	2	2.01	1.98	1.97	1.85	1.97	1.89	Nc1c([N+](=O)[O-])cc([N+](=O)[O-])c2no[n+]([O-])c12
Trinitroxylene	2	115.4	100	2	2.43	2.39	2.17	2.19	2.24	2.16	Cc1c([N+](=O)[O-])cc([N+](=O)[O-])c(C)c1[N+](=O)[O-]
4-picrylamino-1,2,3-triazole	2	-170.8	103	2.01	2.11	2.1	1.84	1.89	1.92	1.6	O=[N+]([O-])c1cc([N+](=O)[O-])c(Nc2c[nH]nn2)c([N+](=O)[O-])c1
2,4-dinitroimidazole	2	47	105	2.02	1.89	2.2	1.79	1.81	2.17	2.11	O=[N+]([O-])c1c[nH]c([N+](=O)[O-])n1
1-Picryl-2-picrylamino-1,2-dihydropyrimidine	2	-193.3	106	2.03	2.17	2.14	2.15	2.17	2.02	1.97	O=[N+]([O-])c1cc([N+](=O)[O-])c(NC2N=CC=CN2c2c([N+](=O)[O-])cc([N+](=O)[O-])cc2[N+](=O)[O-])c([N+](=O)[O-])c1
3,4,5-Trinitrotoluene	2	75.8	107	2.03	2.16	2.13	1.93	1.95	2.06	2	Cc1cc([N+](=O)[O-])c([N+](=O)[O-])c([N+](=O)[O-])c1
2,2-dinitro-1,3-propane-diol	2	509	110	2.04	1.64	1.65	2.04	2.07	2.1	2.04	O=[N+]([O-])C(CO)(CO)[N+](=O)[O-]
N-(t-butyl)-trinitroacetamide	2	360	110	2.04	2.2	2.18	2.36	2.38	2.39	2.29	CC(C)(C)NC(=O)C([N+](=O)[O-])([N+](=O)[O-])[N+](=O)[O-]
Trinitromesitylene	2	155	110	2.04	2.68	2.62	2.39	2.42	2.43	2.32	Cc1c([N+](=O)[O-])c(C)c([N+](=O)[O-])c(C)c1[N+](=O)[O-]
4-nitro-1-picrylpyrazole	2	-97.1	112	2.05	1.91	1.89	1.88	1.91	1.92	1.88	O=[N+]([O-])c1cc([N+](=O)[O-])c(-n2cc([N+](=O)[O-])cn2)c([N+](=O)[O-])c1
methylene-bis-(4,4,4-trinitrobutyramide)	2	549.6	113	2.05	1.69	1.69	1.92	1.95	1.84	1.81	O=C(CCC([N+](=O)[O-])([N+](=O)[O-])[N+](=O)[O-])NCNC(=O)CCC([N+](=O)[O-])([N+](=O)[O-])[N+](=O)[O-]
N-methyl-N,N'-dinitro-1,2-ethanediamine	2	57	114	2.06	1.83	1.97	1.77	1.74	1.88	2.04	CN(CCN[N+](=O)[O-])[N+](=O)[O-]
2,2',4,4',6,6'-hexanitrobibenzyl	2	61.7	114	2.06	2.08	2.05	1.83	1.85	1.75	1.73	O=[N+]([O-])c1cc([N+](=O)[O-])c(CCc2c([N+](=O)[O-])cc([N+](=O)[O-])cc2[N+](=O)[O-])c([N+](=O)[O-])c1
3,5-dinitro-1-methyl-4-picrylpyrazole	2	-39.5	118	2.07	1.82	1.8	1.76	1.79	1.74	1.73	Cn1nc([N+](=O)[O-])c(-c2c([N+](=O)[O-])cc([N+](=O)[O-])cc2[N+](=O)[O-])c1[N+](=O)[O-]
1-hydroxy-3,5-diamino-2,4,6-trinitrobenzene	2	292.7	120	2.08	2.32	1.79	2.05	2.08	2.14	2.07	Nc1c([N+](=O)[O-])c(N)c([N+](=O)[O-])c(O)c1[N+](=O)[O-]
5,5,5-trinitropentan-2-one	2	315.5	125	2.1	1.87	1.86	1.96	1.99	2.05	2	CC(=O)CCC([N+](=O)[O-])([N+](=O)[O-])[N+](=O)[O-]
3,3'-Diamino-2,2',4,4',6,6'-hexanitrobiphenyl	2	60.4	132	2.12	1.95	1.81	1.74	1.77	1.68	1.67	Nc1c([N+](=O)[O-])cc([N+](=O)[O-])c(-c2c([N+](=O)[O-])cc([N+](=O)[O-])c(N)c2[N+](=O)[O-])c1[N+](=O)[O-]
3,3'-diamino-2,2',4,4',6,6'-hexanitrobiphenyl	2	67.5	132	2.12	1.98	1.84	1.84	1.87	1.76	1.74	Nc1c([N+](=O)[O-])cc([N+](=O)[O-])c(Nc2c([N+](=O)[O-])cc([N+](=O)[O-])c(N)c2[N+](=O)[O-])c1[N+](=O)[O-]
N,N'-dipicryl-5,5'-dinitro-3,3'-bi-1,2,4-triazole	2	-289.8	138	2.14	2.04	2.43	1.74	1.77	1.61	1.61	O=[N+]([O-])c1cc([N+](=O)[O-])c(-n2nc(-c3nc([N+](=O)[O-])n(-c4c([N+](=O)[O-])cc([N+](=O)[O-])cc4[N+](=O)[O-])n3)nc2[N+](=O)[O-])c([N+](=O)[O-])c1
2,2-dinitropropanediol-bis-(5,5-dinitro-2-nitraza-hexanoate)	2	1057.7	138	2.14	1.61	1.65	1.72	1.73	1.65	1.71	CC(CCN(C(=O)OCC(COC(=O)N(CCC(C)([N+](=O)[O-])[N+](=O)[O-])[N+](=O)[O-])([N+](=O)[O-])[N+](=O)[O-])[N+](=O)[O-])([N+](=O)[O-])[N+](=O)[O-]
2,2,2-trinitroethyl-4,4-dinitrohexanoate	2	576	138	2.14	1.77	1.76	1.86	1.89	1.82	1.8	CCC(CCC(=O)OCC([N+](=O)[O-])([N+](=O)[O-])[N+](=O)[O-])([N+](=O)[O-])[N+](=O)[O-]
2,4,6-trinitrobenzonitrile	2	-99.9	140	2.15	1.88	1.86	1.77	1.79	1.95	1.91	N#Cc1c([N+](=O)[O-])cc([N+](=O)[O-])cc1[N+](=O)[O-]
4-Nitro-1-picryl-3-picrylaminopyrazole	2	-106.6	149	2.17	1.84	1.83	1.78	1.81	1.67	1.67	O=[N+]([O-])c1cc([N+](=O)[O-])c(Nc2nn(-c3c([N+](=O)[O-])cc([N+](=O)[O-])cc3[N+](=O)[O-])cc2[N+](=O)[O-])c([N+](=O)[O-])c1
2,2-dinitropropyl-trinitrobutyrate	2	549.9	151	2.18	1.9	1.86	1.69	1.72	1.67	1.67	CC(COC(=O)CCC([N+](=O)[O-])([N+](=O)[O-])[N+](=O)[O-])([N+](=O)[O-])[N+](=O)[O-]
1-Methyl-3,5-dinitro-1,2,4-triazole	2	-48.3	155	2.19	1.96	1.86	2.09	2.12	2.45	2.34	Cn1nc([N+](=O)[O-])nc1[N+](=O)[O-]
4-methyl-3,5-dinitro-1,2,4-triazole	2	-55.1	155	2.19	1.96	1.86	2.1	1.42	1.76	1.41	Cn1c([N+](=O)[O-])nnc1[N+](=O)[O-]
1-Amino-3,5-dinitropyrazole	2	-98.8	158	2.2	1.66	1.68	2.12	2.14	2.5	2.39	Nn1nc([N+](=O)[O-])cc1[N+](=O)[O-]
4-nitro-1-picrylimidazole	2	-10.2	161	2.21	1.91	1.89	1.87	1.89	1.9	1.86	O=[N+]([O-])c1cc([N+](=O)[O-])c(-c2[nH]cnc2[N+](=O)[O-])c([N+](=O)[O-])c1
1,7-dimethoxy-2,4,6-trinitrazaheptane	2	326.4	166	2.22	1.98	1.97	2.03	2	2	2.14	COCN(CN(CN(COC)[N+](=O)[O-])[N+](=O)[O-])[N+](=O)[O-]
3-Amino-trinitrotoluene	2	101.2	174	2.24	2.44	2.16	2.09	2.12	2.19	2.12	Cc1c([N+](=O)[O-])cc([N+](=O)[O-])c(N)c1[N+](=O)[O-]
2,4,6-trinitroaniline	2	61.6	177	2.25	2.16	1.89	1.83	1.86	1.98	1.94	Nc1c([N+](=O)[O-])cc([N+](=O)[O-])cc1[N+](=O)[O-]
ANTA-NQ	2	-104.9	188	2.27	1.6	1.76	2.2	2.19	2.41	2.42	NC(=N[N+](=O)[O-])n1nc([N+](=O)[O-])nc1N
1-Ethoxy-2,4,6-trinitrobenzene	2	248.7	190	2.28	2.48	2.36	2.19	2.22	2.24	2.16	CCOc1c([N+](=O)[O-])cc([N+](=O)[O-])cc1[N+](=O)[O-]
2,4,6-trinitro-m-cresol	2	281.4	191	2.28	1.98	1.95	1.94	1.97	2.03	1.98	Cc1c([N+](=O)[O-])cc([N+](=O)[O-])c(O)c1[N+](=O)[O-]
2,4,6-trinitroanisole	2	213	192	2.28	2.22	2.11	1.95	1.97	2.03	1.98	COc1c([N+](=O)[O-])cc([N+](=O)[O-])cc1[N+](=O)[O-]
2,6-bis-(picrylamino)-pyridine	2	-99.1	192	2.28	2.23	2.19	2.18	2.2	2.04	1.99	O=[N+]([O-])c1cc([N+](=O)[O-])c(Nc2cccc(Nc3c([N+](=O)[O-])cc([N+](=O)[O-])cc3[N+](=O)[O-])n2)c([N+](=O)[O-])c1
2',2'-dinitropropyl-2,4,6-trinitrobenzoate	2	469.3	214	2.33	2.05	1.99	1.74	1.77	1.72	1.7	CC(COC(=O)c1c([N+](=O)[O-])cc([N+](=O)[O-])cc1[N+](=O)[O-])([N+](=O)[O-])[N+](=O)[O-]
3-amino-5-picrylamino-1,2,4-triazole	2	-75.2	230	2.36	2.96	2.5	2.55	2.57	2.58	2.46	Nc1n[nH]c(Nc2c([N+](=O)[O-])cc([N+](=O)[O-])cc2[N+](=O)[O-])n1
1-Methyl-3,5-diamino-2,4,6-trinitrobenzene	2	126.7	239	2.38	2.75	2.2	2.26	2.28	2.32	2.24	Cc1c([N+](=O)[O-])c(N)c([N+](=O)[O-])c(N)c1[N+](=O)[O-]
1,3,5,7-Tetranitroadamantane	2	209.6	240	2.38	2.54	2.49	2.2	2.23	2.17	2.1	O=[N+]([O-])C12CC3([N+](=O)[O-])CC([N+](=O)[O-])(C1)CC([N+](=O)[O-])(C2)C3
3,5-dinitro-1-methyl-4-picrylaminopyrazole	2	-32.3	274	2.44	1.85	1.84	1.88	1.91	1.84	1.81	Cn1nc([N+](=O)[O-])c(Nc2c([N+](=O)[O-])cc([N+](=O)[O-])cc2[N+](=O)[O-])c1[N+](=O)[O-]
nitroisobutyl-4,4,4-trinitrobutyrate	2	562.3	279	2.45	2.08	2.06	2.2	2.23	2.17	2.1	CC(C)(COC(=O)CCC([N+](=O)[O-])([N+](=O)[O-])[N+](=O)[O-])[N+](=O)[O-]
3-nitro-1,2,4-triazole-5-one	2	201.8	291	2.46	1.94	1.82	2.68	2.71	3.16	2.97	O=c1[nH]nc([N+](=O)[O-])[nH]1
2,4-dinitroresorcinol	2	427.6	296	2.47	1.97	1.95	2.27	2.3	2.42	2.32	O=[N+]([O-])c1ccc(O)c([N+](=O)[O-])c1O
bis-(2,2-dinitropropyl)-carbonate	2	796.3	300	2.48	2.47	2.35	1.94	1.98	1.93	1.89	CC(COC(=O)OCC(C)([N+](=O)[O-])[N+](=O)[O-])([N+](=O)[O-])[N+](=O)[O-]
2-Nitro-1-picryl-imidazole	2	-0.1	312	2.49	2.07	2.2	1.87	1.9	1.91	1.87	O=[N+]([O-])c1cc([N+](=O)[O-])c(-c2cnc([N+](=O)[O-])[nH]2)c([N+](=O)[O-])c1
4-picrylamino-1,2,4-triazole	2	-257.2	314	2.5	2.11	2.2	2.47	1.99	2.05	1.74	O=[N+]([O-])c1cc([N+](=O)[O-])c(Nn2cnnc2)c([N+](=O)[O-])c1
Nitromethane (NM)	2	100.4	320	2.51	1.94	1.94	1.81	1.84	2.42	2.32	C[N+](=O)[O-]
N-Nitro-N-methylformamide	2	205	320	2.51	1.26	1.73	1.98	1.95	2.25	2.36	CN(C=O)[N+](=O)[O-]
1,3-diamino-2,4,6-trinitrobenzene	2	87.1	320	2.51	2.51	1.94	2.03	2.05	2.15	2.08	Nc1c([N+](=O)[O-])cc([N+](=O)[O-])c(N)c1[N+](=O)[O-]
KESHAVARZ ORIGINAL TEST SET
1-nitro-2,5-bis-(trinitromethyl)-pyrrolidine	1	39.4	6	0.78	0.98	1.13	1.11	1.13	1.08	1.19	O=[N+]([O-])N1C(C([N+](=O)[O-])([N+](=O)[O-])[N+](=O)[O-])CCC1C([N+](=O)[O-])([N+](=O)[O-])[N+](=O)[O-]
N-(2,2,2-trinitroethyl)-3,3,5,5-tetranitro-piperidine	1	142.1	18	1.26	1.35	1.37	1.31	1.34	1.27	1.31	O=[N+]([O-])C1([N+](=O)[O-])CN(CC([N+](=O)[O-])([N+](=O)[O-])[N+](=O)[O-])CC([N+](=O)[O-])([N+](=O)[O-])C1
3,6-bis-(pricrylamino)-s-tetrazine	1	-326.7	61	1.79	1.9	1.89	2.09	2.11	1.96	1.92	O=[N+]([O-])c1cc([N+](=O)[O-])c(Nc2nnc(Nc3c([N+](=O)[O-])cc([N+](=O)[O-])cc3[N+](=O)[O-])nn2)c([N+](=O)[O-])c1
Tripicryl-s-triazine	1	-214.5	85	1.93	1.88	1.86	1.76	1.78	1.61	1.61	O=[N+]([O-])c1cc([N+](=O)[O-])c(-c2nc(-c3c([N+](=O)[O-])cc([N+](=O)[O-])cc3[N+](=O)[O-])nc(-c3c([N+](=O)[O-])cc([N+](=O)[O-])cc3[N+](=O)[O-])n2)c([N+](=O)[O-])c1
2,5,7,9-Tetranitro-2,5,7,9-tetraazabicyclo[4.3.0]nonane-8-one	1	64.4	115	2.06	2.03	1.18	1.2	1.17	1.2	1.44	O=C1N([N+](=O)[O-])C2C(N([N+](=O)[O-])CCN2[N+](=O)[O-])N1[N+](=O)[O-]
3-Amino-5-nitro-1,2,4-triazole	1	-35.7	170	2.23	2.35	2.21	3.15	3.17	4.05	3.74	Nc1n[nH]c([N+](=O)[O-])n1
2,4,6-Tris(3,5-diamino-2,2,4,6-triphenylamino)-1,3,5-triazine	1	-37.5	170	2.23	2.17	2	2.32	2.35	2.08	2.02	Nc1c([N+](=O)[O-])c(N)c([N+](=O)[O-])c(Nc2nc(Nc3c([N+](=O)[O-])c(N)c([N+](=O)[O-])c(N)c3[N+](=O)[O-])nc(Nc3c([N+](=O)[O-])c(N)c([N+](=O)[O-])c(N)c3[N+](=O)[O-])n2)c1[N+](=O)[O-]
INSENSITIVE EXPLOSIVES FOR WHICH ONLY A LOWER BOUND IS AVAILABLE FOR H50
4-Nitro-3-picrylaminopyrazole	1	-55.3	320	2.51	1.95	1.93	2.02	2.04	2.03	1.98	O=[N+]([O-])c1cc([N+](=O)[O-])c(Nc2n[nH]cc2[N+](=O)[O-])c([N+](=O)[O-])c1
3-picrylamino-1,2,4-triazole	1	-120.8	320	2.51	2.97	2.48	2.41	2.44	2.48	2.37	O=[N+]([O-])c1cc([N+](=O)[O-])c(Nc2nc[nH]n2)c([N+](=O)[O-])c1
